12

## Abstract

13

Effective interactions with the environment rely on integration of multisensory

14

signals: our brains must efficiently combine signals that share a common source, and

15

segregate those that do not. Healthy ageing can change or impair this process. This functional

16

magnetic resonance imaging study assessed the neural mechanisms underlying age

17

differences in the integration of auditory and visual spatial cues. Participants were presented

18

with synchronous audiovisual signals at various degrees of spatial disparity and indicated

19

their perceived sound location. Behaviourally, older adults were able to maintain localisation

20

accuracy, albeit with longer response times. At the neural level, they integrated auditory and

21

visual cues into spatial representations along dorsal auditory and visual processing pathways

22

similarly to their younger counterparts, but showed greater activations in a widespread

23

system of frontal, temporal and parietal areas. According to multivariate Bayesian decoding,

24

these areas encoded critical stimulus information beyond that which was encoded in the brain

25

areas commonly activated by both groups. Surprisingly, however, the boost in information

26

provided by these areas with age-related activation increases was comparable across the two

27

age groups.

28

This dissociation—between comparable response accuracy and information encoded

29

in brain activity patterns across the two age groups, but age-related increases in response

30

times and regional activations—suggests that older participants accumulate noisier sensory

31

evidence for longer, to maintain reliable neural encoding of stimulus-relevant information

32

and thus preserve localisation accuracy.

33

## Introduction

34

35

36

37

38

39

40

41

42

43

44

45

46

47

48

49

50

51

52

53

54

55

56

57

The effective integration of multisensory signals is central to our ability to successfully interact with the world. Locating and swatting a mosquito, for example, relies on spatial information from hearing, vision, and touch. When signals from different senses are known to come from a common cause, humans typically perform this integration process in a statistically near-optimal way, weighting the contribution of each input by its relative reliability [1–5] (i.e. inverse of variance; though also see e.g. [6,7]). However, determining specifically which signals share a common cause, and should thus be integrated, is computationally challenging. Young, healthy adults arbitrate between sensory integration and segregation in line with the predictions of normative Bayesian Causal Inference (BCI) [8–12]: they bind signals that are close together in space and time, but process signals independently when they are spatially or temporally disparate and hence unlikely to share a common source. Recent fMRI and EEG research has revealed that, for audiovisual spatial signals, these operations take place dynamically across the cortical hierarchy that encompasses primary sensory areas as well as higher-level regions such as intraparietal sulcus and planum temporale [10,13]. Evidence also suggests that they interact with top-down attentional processes [5,14–19].

Normal healthy ageing leads to a variety of sensory and cognitive changes, including loss of sensory acuity [20–22], reduced processing speed [23], and impaired attentional and working memory processes [24,25]. In multisensory perception, ageing has been associated with altered susceptibility to the sound-induced flash and McGurk illusions [26–30]; these age differences may be caused by various computational or neural mechanisms, including changes in sensory acuity, prior binding tendency, and attentional resources (for further discussion see [31]). By contrast, older adults perform in a way that is comparable to their younger counterparts on audiovisual integration of spatial signals (as indexed by the spatial

58 ventriloquist illusion) [32,33]. They arbitrate between sensory integration and segregation  
59 effectively, and weight signals in a way that is consistent with normative Bayesian Causal  
60 Inference. However, they sacrifice response speed to maintain this audiovisual localisation  
61 accuracy [32].

62 This raises the question of *how* older adults preserve audiovisual integration and  
63 spatial localisation performance, albeit with slower response times, in these intersensory  
64 selective attention paradigms. One possibility is that older adults rely on the same neural  
65 systems as younger adults, but neural processing takes longer to obtain comparable levels of  
66 accuracy. For instance, older adults may accumulate noisier audiovisual evidence for longer  
67 until they reach a decision threshold and commit to a response, as recently suggested by  
68 computational modelling of behavioural data [32]. Further, older adults may exert more top-  
69 down attentional control during this accumulation process to attenuate internal sensory noise.  
70 This longer, and more attentionally demanding, evidence accumulation would be reflected in  
71 increased BOLD responses, particularly in higher-order association cortices (e.g. parietal  
72 cortices) for older relative to younger adults. Critically, however, because the regional BOLD  
73 response reflects the accumulated neural activity, the information about task-relevant  
74 variables that can be decoded from it should be comparable in both age groups.

75 Alternatively, older adults may engage additional cortical regions to compensate for  
76 encoding deficits in the brain regions that are activated by both age groups. In this case, we  
77 would expect age differences not only in the magnitude of the regional BOLD responses, but  
78 also in their information content. In this latter case, the additional brain activations would  
79 encode more task-relevant information in older than in younger participants.

80 To adjudicate between these two hypotheses, we presented healthy younger and older  
81 participants with synchronous audiovisual signals at varying degrees of spatial disparity in a  
82 spatial ventriloquist paradigm. In an auditory selective attention task, participants reported

83 the location of the auditory signal, whilst ignoring the task-irrelevant visual signals (which  
84 were spatially congruent or incongruent). Using multivariate pattern analysis (MVPA), we  
85 first tested whether the age groups similarly combined audiovisual signals into spatial  
86 representations along the dorsal visual and auditory spatial processing hierarchies that have  
87 previously been shown to be engaged in this task [10,13]. Whole-brain univariate analyses  
88 then delineated neural systems that were commonly activated by both age groups during the  
89 task, as well as systems showing greater activations in older participants. Finally, using  
90 multivariate Bayesian decoding (MVB) [34], we assessed whether the regions with greater  
91 activation in older adults encoded critical stimulus information (such as visual and auditory  
92 location or their spatial relationship) to a greater degree in older than younger adults.

93

## Results

94 **Auditory spatial classification performance for older and younger**

95 **adults**

96 We assessed whether ageing impacts the precision with which older adults encode  
97 sound location. In a spatial left-right classification task (outside the scanner), older and  
98 younger adults were presented with unisensory auditory stimuli sampled randomly from 10  
99 possible spatial locations along the azimuth. We fitted psychometric functions to the  
100 proportions of perceived ‘right’ responses individually for each participant and compared the  
101 JND (just-noticeable difference; i.e. spatial reliability or sensitivity) and PSE (point of  
102 subjective equality; left/right bias) between older and younger participants in two-sample  $t$   
103 tests. We observed no significant differences in spatial precision or left/right bias between  
104 age groups; only a non-significant trend of larger JNDs (lower auditory spatial reliability)  
105 was evident in older adults: JND  $t(30) = 1.532, p = .136, d = 0.542$ ; PSE  $t(30) = 0.527, p$   
106  $= .602, d = 0.186$ . This suggests comparable localisation performance for older and younger  
107 participant groups in an unspeeded auditory spatial classification task.

108 **Audiovisual integration behaviour for older and younger adults**

109 **(inside the scanner)**

110 In the main experiment inside the scanner, participants were presented with  
111 synchronous auditory and visual signals at the same (i.e. congruent) or opposite (i.e.  
112 incongruent) locations sampled from four possible spatial locations ( $-15^\circ, -5^\circ, 5^\circ, \text{ or } 15^\circ$   
113 visual angle) along the azimuth. The experimental design thus conformed to a 4 (auditory  
114 location:  $-15^\circ, -5^\circ, 5^\circ, \text{ or } 15^\circ$  azimuth) x 3 (sensory context: unisensory auditory, audiovisual  
115 congruent, audiovisual incongruent) factorial design (see Fig 1B). On each trial, participants

116 reported their perceived sound location as accurately as possible by pressing one of four  
117 spatially corresponding buttons with their right hand. For behavioural analysis, we pooled  
118 over hemifield and entered observers' response accuracy and reaction times into a 2  
119 (eccentricity: small  $\pm 5^\circ$  vs. large  $\pm 15^\circ$ ) x 3 (sensory context: unisensory auditory,  
120 audiovisual congruent, audiovisual incongruent) x 2 (age group: younger, older) mixed  
121 ANOVA. For localisation accuracy, this mixed ANOVA identified significant main effects of  
122 eccentricity and sensory context (see Table 1). Further, a small three-way (eccentricity x  
123 sensory context x age) interaction was observed, reflecting a slightly stronger visual influence  
124 on perceived sound location in older adults for audiovisual stimuli at large spatial disparities  
125 (see right panel of Fig 1C). This stronger audiovisual crossmodal bias in older adults was not  
126 observed in previous research that was performed outside the scanner [32]. This small  
127 discrepancy between studies may be explained by the adverse listening conditions inside the  
128 scanner that make it more difficult for observers to reliably arbitrate between sensory  
129 integration and segregation, even at large spatial disparities (see [9]). No other significant  
130 effects were observed.

131 The corresponding 2 x 3 x 2 mixed ANOVA of participants' median reaction times  
132 (inside the scanner) revealed main effects of age and sensory context as well as an interaction  
133 between sensory context and eccentricity (see Table 1). Older adults were overall slower than  
134 younger adults. Participants responded fastest to unisensory auditory stimuli, slower to  
135 audiovisual congruent stimuli, and slowest to audiovisual incongruent stimuli. The longer  
136 response times for audiovisual congruent compared to unisensory auditory stimuli is a  
137 surprising finding that may again be explained by the causal uncertainty invoked by the  
138 competing scanner noise. Because unisensory auditory, congruent audiovisual, and  
139 incongruent audiovisual stimuli were presented intermixed, observers needed to infer whether  
140 audiovisual signals came from the same source and should thus be integrated. Causal

141 inference becomes more challenging in adverse listening situations, placing extra attentional  
142 demands on our audiovisual trials that may outweigh any multisensory benefit. Further, as  
143 indicated by the significant interaction between eccentricity and sensory context, observers  
144 were slower to respond to more centrally than peripherally presented sounds, particularly in  
145 the unisensory auditory context. None of these effects significantly interacted with age,  
146 however. See Table 1 for detailed results of sound localisation responses and response times.  
147 In summary, while older adults were substantially slower than younger adults across all  
148 conditions, their auditory localisation performance was largely comparable to their younger  
149 counterparts.



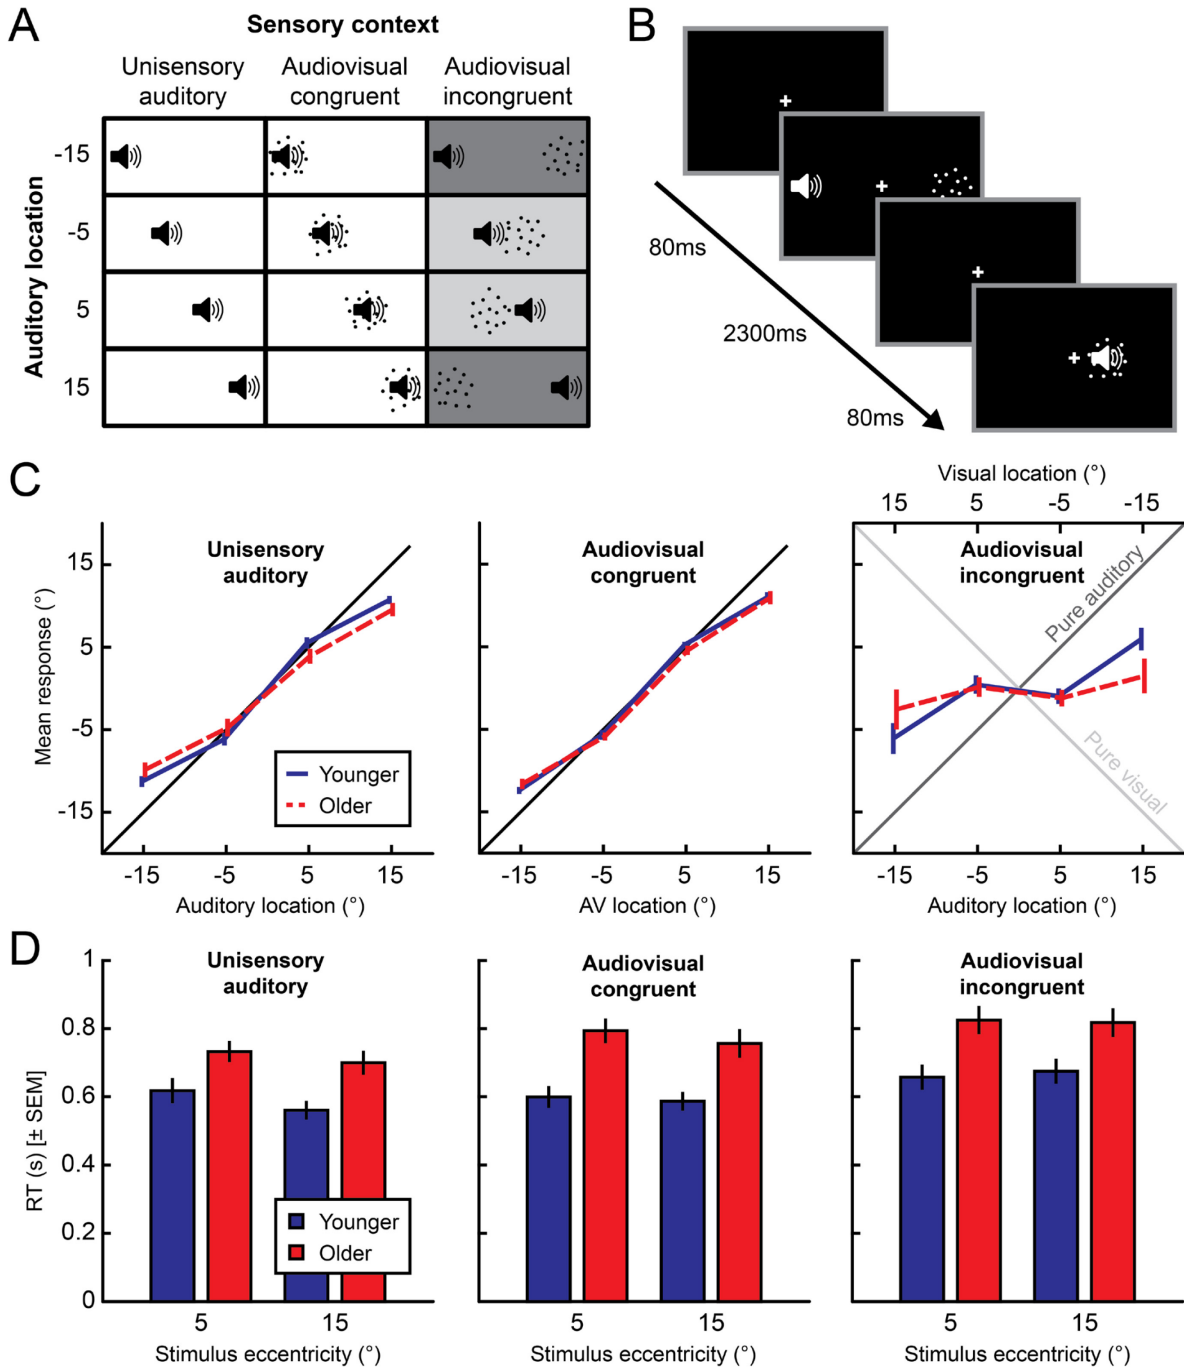

150

151

152 **Fig 1. Experimental design and behavioural results.**

153 (A and B) The experiment conformed to a 4 (auditory location)  $\times$  3 (sensory context:  
154 unisensory auditory, audiovisual congruent, audiovisual incongruent) factorial design.  
155 Auditory (white noise bursts) and visual signals (cloud of dots) were sampled from four  
156 possible azimuthal locations ( $-15^\circ$ ,  $-5^\circ$ ,  $5^\circ$ , or  $15^\circ$ ). Auditory and visual stimuli were  
157 presented either at same (congruent) or opposite spatial locations (incongruent). Participants  
158 reported their perceived location of the sound. (C) Across-participants mean ( $\pm$  SEM)  
159 perceived sound locations as a function of the true sound location ( $x$  axis). Older and younger  
160 adults showed comparable central biases (i.e. deviations from the identity line) for unisensory  
161 and audiovisual congruent stimuli. For spatially incongruent stimuli, older adults showed a  
162 slightly stronger spatial bias in their perceived sound location towards the location of the  
163 incongruent visual signal. (D) Behavioural response times (pooled over left and right  
164 hemifields; across-participants means of condition-specific medians). Participants responded  
165 more slowly to audiovisual incongruent relative to audiovisual congruent and auditory-only  
166 stimuli. Older adults were significantly slower in all conditions, but this did not interact with  
167 any other factor.

168 **Table 1. Results of mixed ANOVAs on mean auditory localisation responses and median**  
 169 **reaction times during the spatial ventriloquist task (inside the scanner).**

|                                      | <i>df</i> |        | <i>F</i> | <i>p</i>      | $\eta_p^2$ |
|--------------------------------------|-----------|--------|----------|---------------|------------|
|                                      | effect    | error  |          |               |            |
| <i>Mean localisation responses</i>   |           |        |          |               |            |
| Eccentricity                         | 1         | 30     | 262.844  | < <b>.001</b> | .898       |
| Eccentricity x Age                   | 1         | 30     | 3.970    | .055          | .117       |
| Sensory context                      | 1.144     | 34.335 | 51.117   | < <b>.001</b> | .630       |
| Sensory context x Age                | 1.144     | 34.335 | 0.646    | .447          | .021       |
| Eccentricity x Sensory context       | 1.204     | 36.111 | 2.045    | .159          | .064       |
| Eccentricity x Sensory context x Age | 1.204     | 36.111 | 5.344    | <b>.021</b>   | .151       |
| Age                                  | 1         | 30     | 2.189    | .149          | .068       |
| <i>Median reaction times</i>         |           |        |          |               |            |
| Eccentricity                         | 1         | 30     | 3.261    | .081          | .098       |
| Eccentricity x Age                   | 1         | 30     | 0.119    | .733          | .004       |
| Sensory context                      | 2         | 60     | 34.145   | < <b>.001</b> | .532       |
| Sensory context x Age                | 2         | 60     | 3.010    | .057          | .091       |
| Eccentricity x Sensory context       | 1.575     | 47.236 | 6.095    | <b>.008</b>   | .169       |
| Eccentricity x Sensory context x Age | 1.575     | 47.236 | 1.944    | .162          | .061       |
| Age                                  | 1         | 30     | 10.914   | <b>.002</b>   | .267       |

170 Degrees of freedom Greenhouse-Geisser corrected for non-sphericity where applicable.

## 171 **fMRI results**

172 We used fMRI to assess the commonalities and differences in the neural systems  
173 underlying audiovisual spatial processing between younger and older adults, in three steps.  
174 First, we characterised how younger and older participants integrate auditory and visual  
175 information into spatial representations along the dorsal audiovisual processing hierarchies,  
176 using support vector regression. Second, we identified commonalities and differences in  
177 regional BOLD responses for older and younger adults, using mass-univariate fMRI analyses.  
178 Third, we investigated whether age-related BOLD-response increases encode critical stimulus  
179 information (such as visual and auditory location or their spatial relationship) to a greater  
180 degree in older than younger adults, using multivariate Bayesian decoding (MVB) [34].

### 181 **Decoding audiovisual spatial estimates using support vector regression**

182 Fig 2 shows the spatial locations decoded with support vector regression from  
183 regional BOLD-response patterns for unisensory auditory, congruent audiovisual, and  
184 incongruent audiovisual incongruent stimuli along the dorsal auditory and visual processing  
185 hierarchies (see also Tables 2 and 3). As previously reported for younger populations [10,13],  
186 primary auditory area A1 and “higher-level” auditory area planum temporale (PT) encoded  
187 mainly the sound location, while “low-level” visual areas V1-V3, posterior intraparietal  
188 sulcus (IPS 0-2) and, anterior intraparietal sulcus (IPS 3-4) represented the visual location.  
189 Importantly, the decoding profiles differed for congruent and incongruent audiovisual stimuli  
190 in all regions. In auditory area PT, incongruent visual inputs biased auditory spatial encoding  
191 mainly at small spatial disparities (i.e. a “neural ventriloquist effect”). These crossmodal  
192 biases broke down at large spatial disparities, when the brain infers that two signals come  
193 from different sources - thereby mirroring the integration profile observed at the behavioural  
194 level. Surprisingly, in visual areas we observed an influence of a displaced sound on the

195 decoded spatial location mainly at large spatial disparities. This pattern may be explained by  
196 the fact that at small spatial disparities, observers experience a ventriloquist illusion and thus  
197 perceive the sound shifted towards the visual signal. By contrast, at large spatial disparities  
198 (when observers are less likely to experience a ventriloquist illusion), a displaced sound from  
199 the opposite hemifield biases the spatial encoding in visual cortices via mechanisms of top-  
200 down attention. As previously reported [10,13], these crossmodal interactions increased  
201 across the cortical hierarchy, being more pronounced in IPS and PT than in early visual and  
202 auditory cortices.

203         These impressions were confirmed statistically by the 2 (eccentricity: small, large) x 3  
204 (sensory context: unisensory auditory, audiovisual congruent, audiovisual incongruent) x 2  
205 (age: younger, older) mixed ANOVAs of the decoded spatial estimates, separately for each  
206 region of interest (ROI) along the visual and auditory processing hierarchy (Table 2). We  
207 observed main effects of stimulus eccentricity for all ROIs, confirming that all regions  
208 encoded information about the location of the stimuli. Intriguingly, main effects of sensory  
209 context were also present in all ROIs, suggesting that even putatively unisensory regions held  
210 at least some information about whether a visual stimulus was present and/or its spatial  
211 congruence with the sound. We confirmed that these sensory context effects were not driven  
212 entirely by differences between unisensory auditory vs. audiovisual stimuli: a follow-up  
213 ANOVA that excluded the unisensory condition, so 2 (eccentricity: small, large) x 2  
214 (congruency: congruent vs incongruent) x 2 (age group: older vs. younger), revealed a  
215 significant main effect of congruency for all ROIs, and a significant congruence x  
216 eccentricity interaction in areas V1 – V3, IPS 0 – 2, and IPS 3 – 4 (for detailed results see  
217 tables in Supporting Information).

218         Crucially, however, age had almost no effect on the locations decoded from the  
219 activation patterns along the auditory and visual spatial processing hierarchies (see Fig 3 and

220 Tables 2 and 3). We observed a single significant age-related effect across all ANOVAs: an  
221 age x sensory context interaction selectively in visual areas V1 to V3. However, in the  
222 follow-up ANOVA that excluded the unisensory auditory condition, the age x congruency  
223 interaction was not significant, and independent-samples *t* tests comparing the age groups in  
224 all conditions only revealed an age difference for unisensory stimuli at large eccentricities  
225 ( $t(30) = 2.623, p = .014$  (uncorr.),  $d = 0.927$ ; see leftmost panel of Fig 3A). Collectively,  
226 these results compellingly demonstrate that younger and older adults similarly combine  
227 auditory and visual signals into spatial representations in regions along the auditory and  
228 visual processing hierarchies.

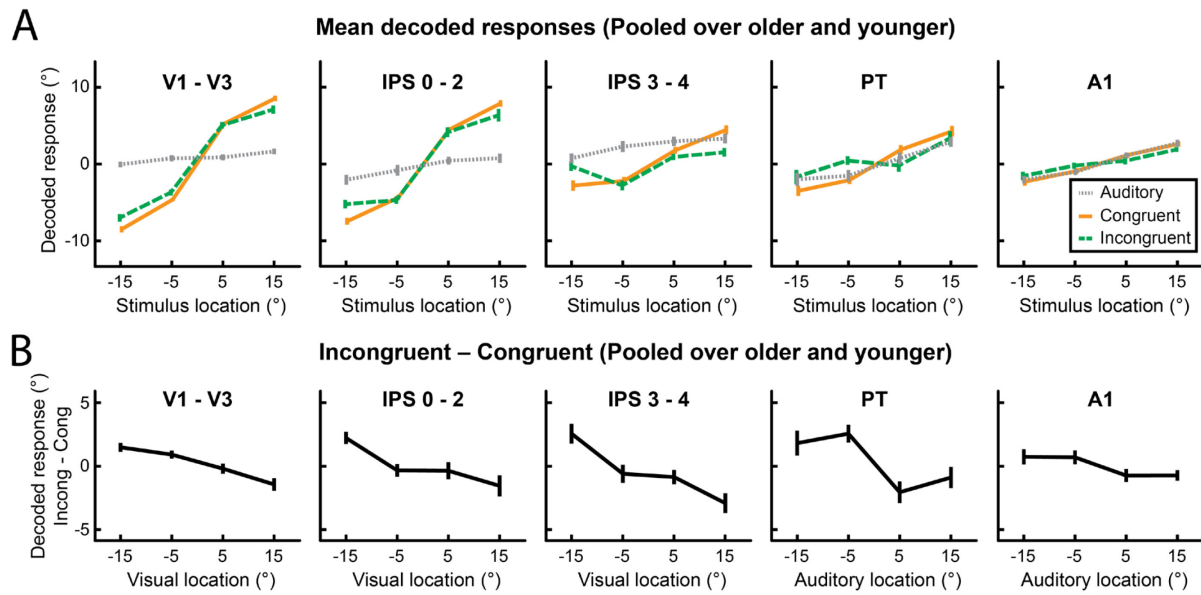

229

230

231 **Fig 2. fMRI multivariate decoding results (support vector regression) pooled over age**

232 **groups.**

233 (A) Across-participants mean ( $\pm 1$  SEM) decoded spatial locations for unisensory auditory

234 (grey), audiovisual congruent (orange), and audiovisual incongruent (green) stimuli. (B)

235 Difference between decoded stimulus locations for audiovisual incongruent relative to

236 audiovisual congruent stimuli. Results for five ROIs are shown: visual regions (V1 - V3);

237 posterior intraparietal sulcus (IPS 0 - 2); anterior intraparietal sulcus (IPS 3 - 4); planum

238 temporale (PT); and primary auditory cortex (A1). Note that the  $x$  axis is labelled according

239 to each region's dominant sensory modality (i.e. visual location for V1-3 and IPS, auditory

240 location for PT and A1) to allow for easier comparison between conditions and regions.

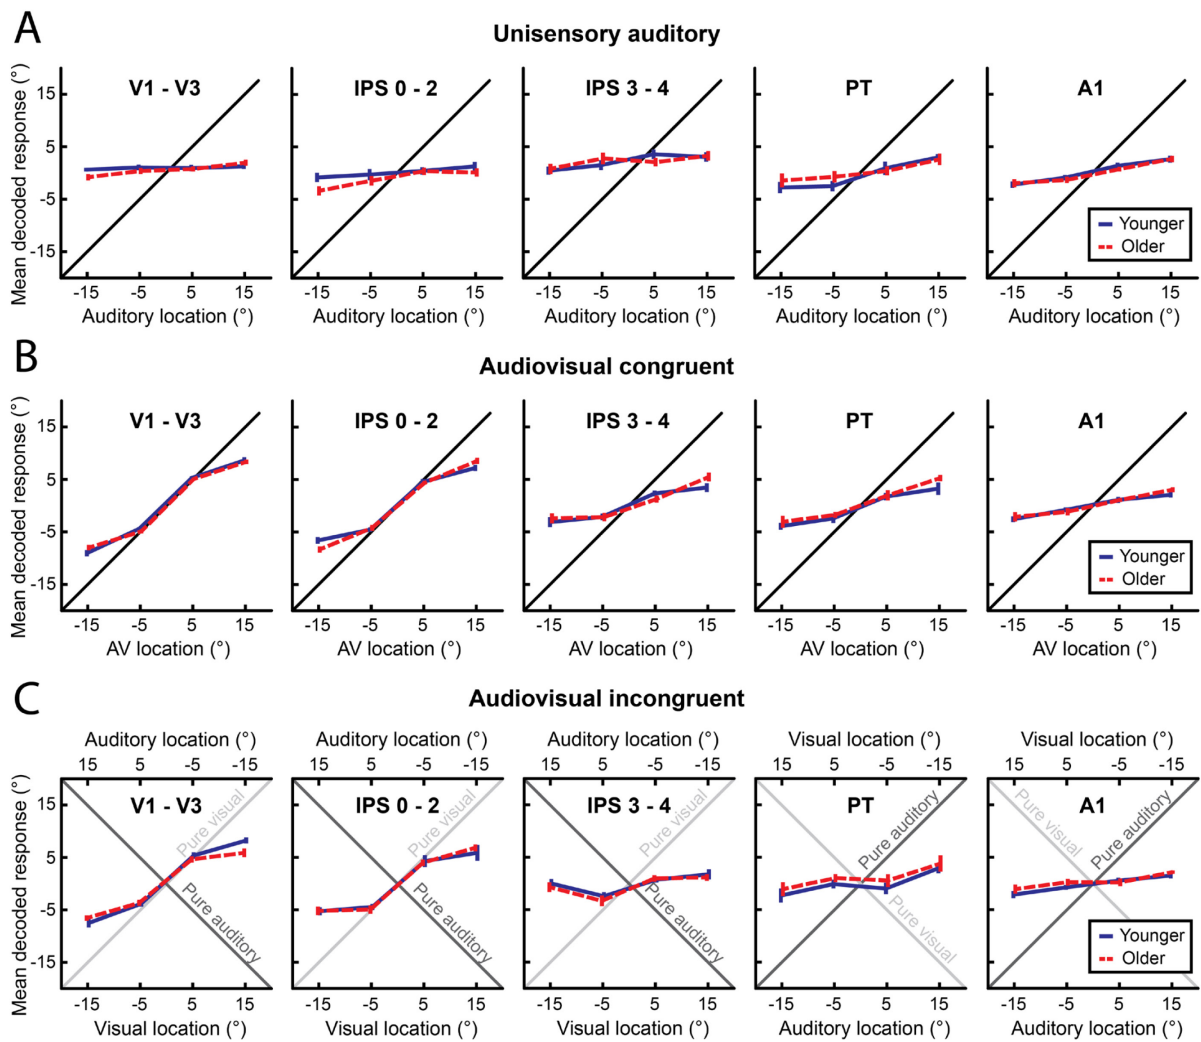

241

242 **Fig 3. fMRI multivariate decoding results (support vector regression) separately for older**  
 243 **and younger adults.**

244 Across-participants mean ( $\pm 1$  SEM) decoded spatial locations for younger (blue) and older  
 245 (red) participants for (A) unisensory auditory, (B) congruent audiovisual, and (C) incongruent  
 246 audiovisual stimuli. Results for five ROIs are shown: visual regions (V1 - V3); posterior  
 247 intraparietal sulcus (IPS 0 - 2); anterior intraparietal sulcus (IPS 3 - 4); planum temporale (PT);  
 248 and primary auditory cortex (A1). Note that for incongruent conditions the location of stimuli  
 249 in the region's dominant sensory modality is plotted on the lower  $x$  axis (i.e. visual location for  
 250 V1-3 and IPS, auditory location for PT and A1) to allow for easier comparison between  
 251 conditions and regions.

252



253 **Table 2. Results of ANOVAs on SVR decoded responses in five ROIs (including**  
 254 **unisensory auditory).**

|                                      | <i>df</i> |        | <i>F</i> | <i>p</i> | $\eta_p^2$ |
|--------------------------------------|-----------|--------|----------|----------|------------|
|                                      | effect    | error  |          |          |            |
| <i>VI - 3</i>                        |           |        |          |          |            |
| Eccentricity                         | 1         | 30     | 117.363  | < .001   | .796       |
| Eccentricity x Age                   | 1         | 30     | 0.874    | .357     | .028       |
| Sensory context                      | 1.568     | 47.036 | 328.707  | < .001   | .916       |
| Sensory context x Age                | 1.568     | 47.036 | 5.281    | .014     | .150       |
| Eccentricity x Sensory context       | 1.620     | 48.588 | 22.205   | < .001   | .425       |
| Eccentricity x Sensory context x Age | 1.620     | 48.588 | 3.165    | .061     | .095       |
| Age                                  | 1         | 30     | 0.386    | .539     | .013       |
| <i>IPS 0 - 2</i>                     |           |        |          |          |            |
| Eccentricity                         | 1         | 30     | 47.714   | < .001   | .614       |
| Eccentricity x Age                   | 1         | 30     | 2.075    | .160     | .065       |
| Sensory context                      | 1.656     | 49.671 | 108.823  | < .001   | .784       |
| Sensory context x Age                | 1.656     | 49.671 | 0.170    | .804     | .006       |
| Eccentricity x Sensory context       | 1.603     | 48.084 | 9.836    | .001     | .247       |
| Eccentricity x Sensory context x Age | 1.603     | 48.084 | 1.140    | .318     | .037       |
| Age                                  | 1         | 30     | 1.845    | .185     | .058       |
| <i>IPS 3 - 4</i>                     |           |        |          |          |            |
| Eccentricity                         | 1         | 30     | 5.152    | .031     | .147       |
| Eccentricity x Age                   | 1         | 30     | 1.894    | .179     | .059       |
| Sensory context                      | 2         | 60     | 14.072   | < .001   | .319       |
| Sensory context x Age                | 2         | 60     | 0.954    | .391     | .031       |
| Eccentricity x Sensory context       | 2         | 60     | 8.495    | .001     | .221       |
| Eccentricity x Sensory context x Age | 2         | 60     | 1.210    | .305     | .039       |
| Age                                  | 1         | 30     | 0.125    | .726     | .004       |
| <i>PT</i>                            |           |        |          |          |            |
| Eccentricity                         | 1         | 30     | 31.000   | < .001   | .508       |
| Eccentricity x Age                   | 1         | 30     | 0.112    | .740     | .004       |
| Sensory context                      | 2         | 60     | 10.694   | < .001   | .263       |
| Sensory context x Age                | 2         | 60     | 1.275    | .287     | .041       |
| Eccentricity x Sensory context       | 2         | 60     | 2.129    | .128     | .066       |
| Eccentricity x Sensory context x Age | 2         | 60     | 0.285    | .753     | .009       |
| Age                                  | 1         | 30     | 0.216    | .645     | .007       |
| <i>AI</i>                            |           |        |          |          |            |
| Eccentricity                         | 1         | 30     | 21.772   | < .001   | .421       |
| Eccentricity x Age                   | 1         | 30     | 0.092    | .764     | .003       |
| Sensory context                      | 2         | 60     | 4.239    | .019     | .124       |
| Sensory context x Age                | 2         | 60     | 0.646    | .528     | .021       |
| Eccentricity x Sensory context       | 2         | 60     | 0.044    | .957     | .001       |
| Eccentricity x Sensory context x Age | 2         | 60     | 0.155    | .856     | .005       |
| Age                                  | 1         | 30     | 0.110    | .743     | .004       |

255 Degrees of freedom Greenhouse-Geisser corrected for non-sphericity where applicable.

## 256 **Conventional mass-univariate GLM analysis**

257           The above SVR analysis showed that regions along the auditory and visual spatial  
258 processing hierarchies integrate sensory signals into spatial representations similarly in both  
259 age groups. Using mass-univariate general linear model (GLM) analysis, we next  
260 investigated whether older and younger adults engage overlapping or partly distinct neural  
261 systems for audiovisual processing (i.e. all stimulus conditions > fixation). Moreover, we  
262 assessed the neural underpinnings of cognitive control and attentional operations that are  
263 critical for localising a sound when presented together with a spatially displaced visual signal  
264 (i.e. incongruent > congruent audiovisual stimuli; see Table 3, and Figs 4 and 5, for details).

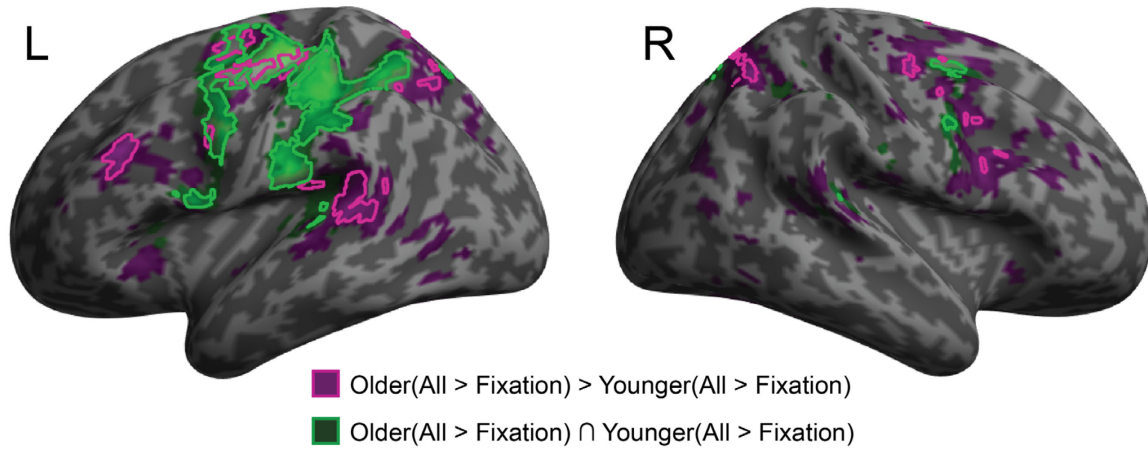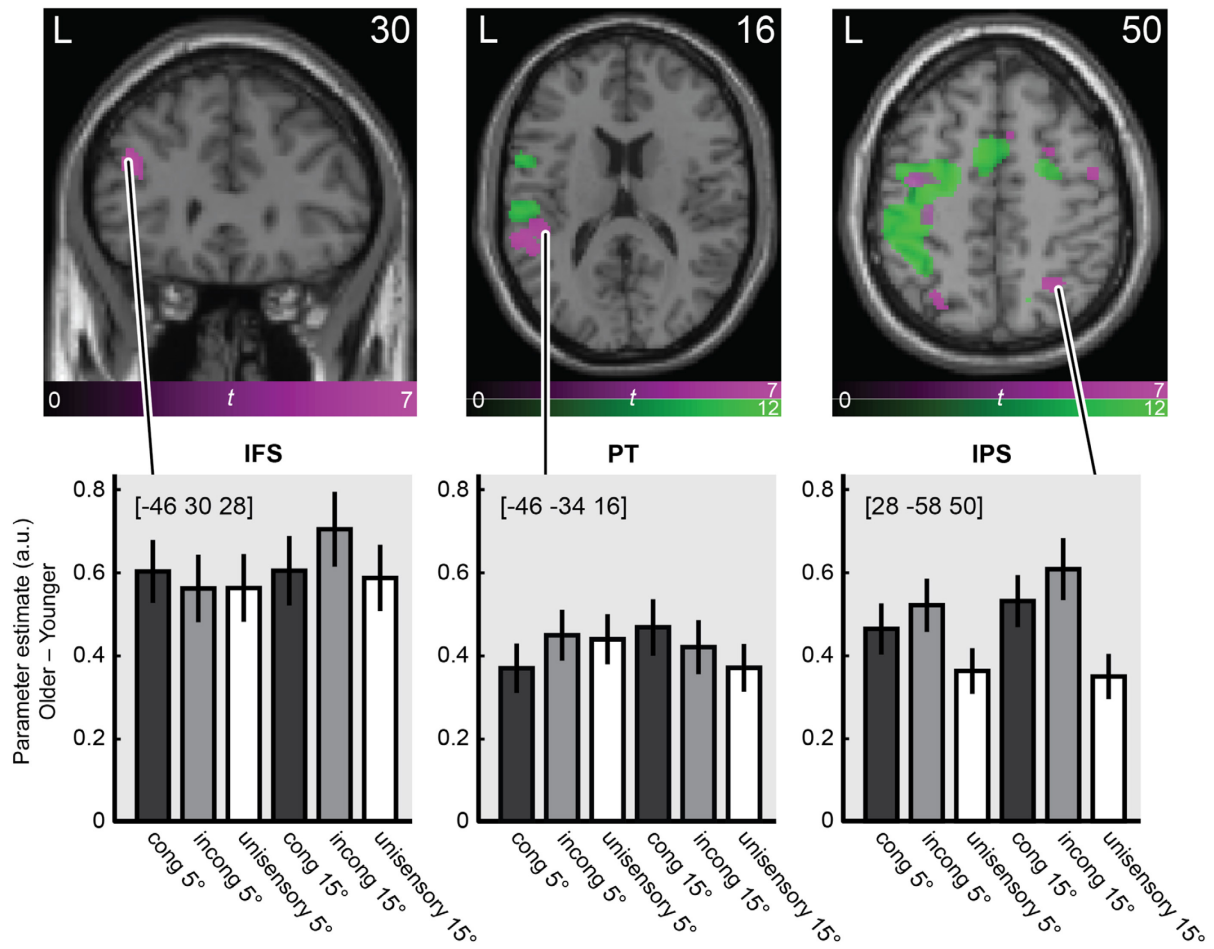

265

266

267 **Fig 4. fMRI activation results for older and younger adults.**

268 Activations for all stimuli (i.e. pooled over auditory, audiovisual congruent and incongruent)  
269 relative to fixation are rendered on an inflated canonical brain (top row) and  
270 coronal/transverse sections (middle row). Green = conjunction over both age groups ( $All_{Older}$   
271  $> Fixation_{Older}$ )  $\cap$  ( $All_{Younger} > Fixation_{Younger}$ ). Purple = age related activation increases  
272 ( $All_{Older} > Fixation_{Older}$ )  $>$  ( $All_{Younger} > Fixation_{Younger}$ ). For inflated brain: bright outlines =  
273 height threshold  $p < .05$  whole-brain FWE-corrected. For visualisation purposes we also  
274 show activations at  $p < .001$ , uncorrected, as darker filled areas. Extent threshold  $k > 0$   
275 voxels). For brain sections, height threshold  $p < .05$  whole-brain FWE-corrected.  
276 Bottom row: Bar plots show mean ( $\pm 1 SEM$ ) age differences in parameter estimates  
277 (arbitrary units) for audiovisual congruent, audiovisual incongruent, and unisensory auditory  
278 stimuli at  $5^\circ$  and  $15^\circ$  eccentricities, pooled over left and right stimulus locations, at the  
279 indicated peak MNI coordinates. Three illustrative anatomical regions are shown: left inferior  
280 frontal sulcus [IFS], left planum temporale [PT], and right intraparietal sulcus [IPS].

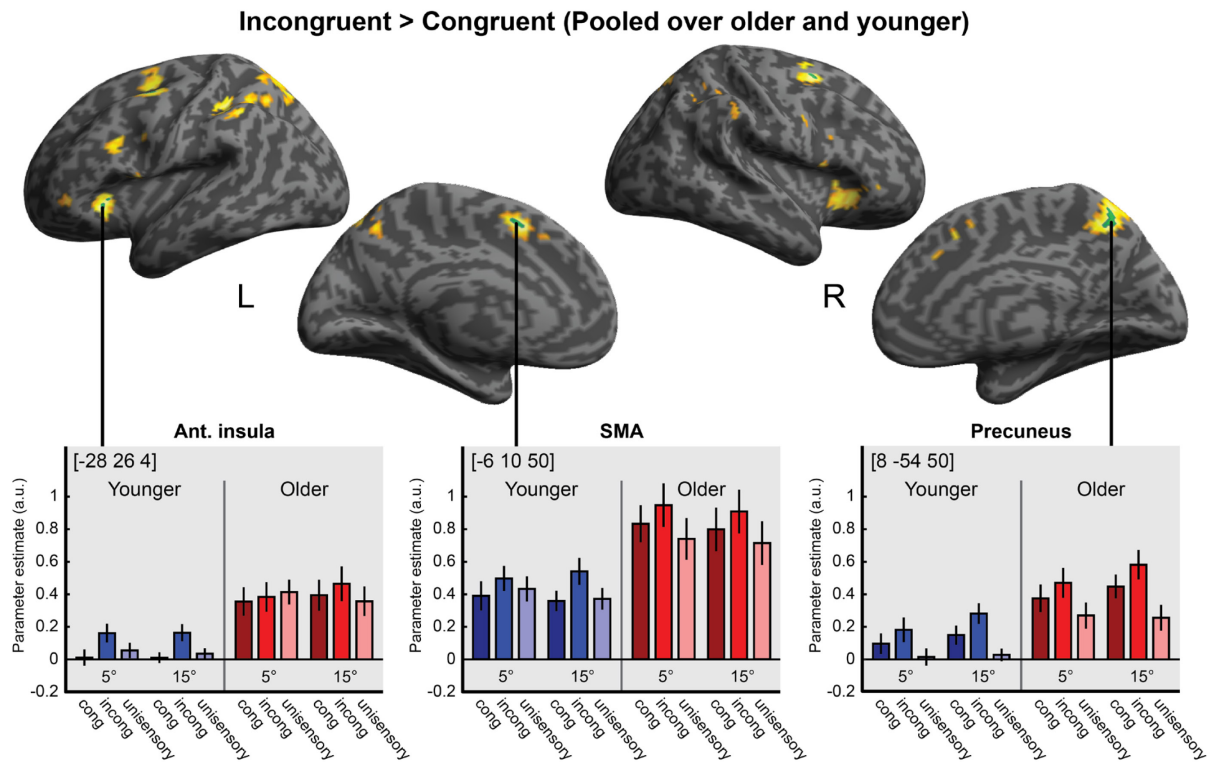

281

282 **Fig 5. Activation increases for incongruent > congruent audiovisual stimuli.**

283 Activation increases for incongruent relative to congruent stimuli (pooled over age groups)

284 are rendered on an inflated canonical brain. Green areas = height threshold  $p < .05$ , whole-

285 brain FWE-corrected. For visualisation purposes we also show activations at  $p < .001$ ,

286 uncorrected, in yellow. Bar plots show parameter estimates (across-participants mean  $\pm$  1

287  $SEM$ ; arbitrary units) for congruent, incongruent, and unisensory stimuli at 5° and 15°

288 eccentricities, pooled over left and right auditory (and in audiovisual conditions, visual

289 locations), at the indicated MNI peak coordinates in three anatomical regions: left anterior

290 insula, left supplementary motor area (SMA), and right precuneus.

291 **Effects of stimuli and task relative to fixation**

292 A conjunction analysis over age groups revealed stimulus-induced activations in a  
293 widespread neural system encompassing key areas of the auditory spatial processing  
294 hierarchy such as left planum temporale, extending into left inferior parietal lobe and  
295 intraparietal sulci bilaterally ( $All_{Older} > Fixation_{Older}$ )  $\cap$  ( $All_{Younger} > Fixation_{Younger}$ ) [35,36].  
296 At a lower threshold of significance, we also observed stimulus-induced activations in the  
297 right hemisphere from right planum temporale into inferior parietal lobe and bilateral insulae.  
298 Moreover, we observed common activations related to response selection and motor  
299 processing in left precentral gyrus/sulcus and right cerebellum.

300 Next, we identified regions with greater activations for older relative to younger  
301 adults by testing for the interaction ( $All_{Older} > Fixation_{Older}$ )  $>$  ( $All_{Younger} > Fixation_{Younger}$ ).  
302 We observed activation increases for older adults in dorsolateral prefrontal cortices along the  
303 inferior frontal sulcus. Interestingly, increased activations for older adults were often found  
304 adjacent to the regions that were commonly activated for both groups. For instance, we  
305 observed greater activations in the lateral plana temporalia extending into more posterior  
306 superior temporal cortices. Likewise, the parietal activations extended from the activation  
307 clusters observed for both age groups more posteriorly. Moreover, older adults showed  
308 increased activations in the inferior frontal sulcus, a region previously implicated in cognitive  
309 control of audiovisual processing tasks [37,38]. In summary, older adults showed increased  
310 activations relative to younger adults along the spatial auditory pathways from temporal to  
311 parietal and frontal cortices.

312 The opposite contrast ( $All_{Younger} > Fixation_{Younger}$ )  $>$  ( $All_{Older} > Fixation_{Older}$ ) revealed  
313 no activations that were significantly greater in the younger age group.

314 **Effects of audiovisual spatial incongruency**

315 Consistent with previous research [14,37–39], incongruent relative to congruent  
316 audiovisual stimuli increased activations in a widespread attentional and cognitive control  
317 system including medial and lateral posterior parietal cortices, inferior frontal sulcus and  
318 bilateral anterior insulae (i.e.  $Incong > Cong$ , pooled over age groups). However, none of  
319 these incongruency effects interacted with age group after whole-brain correction ( $Incong_{Older}$   
320  $> Cong_{Older}$ )  $>$  ( $Incong_{Younger} > Cong_{Younger}$ ) or ( $Incong_{Younger} > Cong_{Younger}$ )  $>$  ( $Incong_{Older} >$   
321  $Cong_{Older}$ ).

322

323 **Table 3. Mass univariate fMRI analysis – results.**

| Region                                                | Coordinates |     |     | z-score | p-value (FWE*) |
|-------------------------------------------------------|-------------|-----|-----|---------|----------------|
| <i>O(All &gt; Fixation) ∩ Y(All &gt; Fixation)</i>    |             |     |     |         |                |
| R. cerebellum                                         | 22          | -54 | -24 | > 8     | < .001         |
| R. cerebellum                                         | 6           | -62 | -16 | 6.9     | < .001         |
| R. cerebellum                                         | 8           | -72 | -16 | 5.9     | < .001         |
| L. precentral gyrus                                   | -36         | -20 | 64  | > 8     | < .001         |
| L. precentral sulcus                                  | -32         | -4  | 58  | > 8     | < .001         |
| L. intraparietal sulcus                               | -46         | -34 | 42  | > 8     | < .001         |
| L. supplementary motor area                           | -4          | 0   | 56  | > 8     | < .001         |
| R. superior frontal sulcus                            | 24          | -2  | 50  | 5.7     | < .001         |
| L. thalamus                                           | -14         | -18 | 6   | 5.4     | 0.002          |
| L. intraparietal sulcus                               | -18         | -68 | 54  | 5.4     | 0.002          |
| R. precentral gyrus                                   | 52          | 4   | 42  | 5.1     | 0.005          |
| L. planum temporale                                   | -40         | -36 | 10  | 5.1     | 0.007          |
| L. anterior insula                                    | -30         | 18  | 8   | 5.0     | 0.009          |
| L. superior frontal gyrus                             | -16         | -6  | 68  | 5.0     | 0.011          |
| R. intraparietal sulcus                               | 14          | -66 | 52  | 4.9     | 0.014          |
| R. superior temporal gyrus                            | 58          | -34 | 14  | 4.8     | 0.027          |
| <i>Incong &gt; Cong (Pooled over age groups)</i>      |             |     |     |         |                |
| R. precuneus                                          | 8           | -54 | 50  | 5.2     | < .001         |
| L. supplementary motor area                           | -6          | 10  | 50  | 5.0     | < .001         |
| L. superior frontal sulcus                            | -26         | 6   | 58  | 5.0     | < .001         |
| L. superior frontal sulcus                            | -26         | -2  | 48  | 4.9     | < .001         |
| L. anterior insula                                    | -28         | 26  | 4   | 5.0     | < .001         |
| R. superior frontal sulcus                            | 24          | 2   | 54  | 4.8     | < .001         |
| R. anterior insula                                    | 32          | 26  | -4  | 4.8     | < .001         |
| L. superior frontal sulcus                            | -30         | -2  | 62  | 4.7     | < .001         |
| <i>O(All &gt; Fixation) &gt; Y(All &gt; Fixation)</i> |             |     |     |         |                |
| L. inferior frontal sulcus                            | -46         | 30  | 28  | 7.3     | < .001         |
| L. precentral gyrus                                   | -38         | -8  | 54  | 6.6     | < .001         |
| L. supplementary motor area                           | -8          | -8  | 64  | 6.3     | < .001         |
| L. superior frontal sulcus                            | -20         | -8  | 56  | 5.8     | < .001         |
| L. superior temporal gyrus                            | -60         | -40 | 12  | 5.8     | < .001         |
| L. planum temporale                                   | -46         | -34 | 16  | 5.6     | .001           |
| L. supramarginal gyrus                                | -50         | -44 | 22  | 5.4     | .001           |
| R. intraparietal sulcus                               | 28          | -58 | 50  | 5.6     | .001           |
| R. precuneus                                          | 12          | -62 | 62  | 5.5     | .001           |
| R. intraparietal sulcus                               | 24          | -62 | 56  | 5.0     | .011           |
| R. precentral sulcus                                  | 48          | -4  | 52  | 5.6     | .001           |



|                             |     |     |    |     |      |
|-----------------------------|-----|-----|----|-----|------|
| R. supplementary motor area | 8   | 18  | 46 | 5.5 | .001 |
| R. inferior frontal sulcus  | 36  | 2   | 36 | 5.4 | .002 |
| L. precuneus                | -10 | -64 | 58 | 5.3 | .002 |
| L. intraparietal sulcus     | -26 | -70 | 50 | 5.2 | .004 |
| R. superior frontal sulcus  | 26  | -6  | 56 | 5.2 | .004 |
| R. supplementary motor area | 10  | 6   | 56 | 5.2 | .005 |
| R. superior frontal sulcus  | 26  | 6   | 54 | 5.2 | .005 |
| L. precentral sulcus        | -46 | 6   | 34 | 5.1 | .007 |
| L. precentral sulcus        | -50 | -8  | 46 | 5.0 | .012 |
| L. intraparietal sulcus     | -28 | -54 | 46 | 4.9 | .014 |
| L. superior temporal pole   | -52 | 14  | -4 | 4.9 | .018 |
| R. inferior frontal sulcus  | 38  | 14  | 26 | 4.9 | .019 |
| L. intraparietal sulcus     | -24 | -62 | 58 | 4.8 | .031 |
| L. intraparietal sulcus     | -44 | -40 | 34 | 4.7 | .037 |
| L. anterior insula          | -30 | 24  | 0  | 4.7 | .047 |

324

---

\**p* values whole-brain corrected for family-wise errors at the voxel level.

## 325 **Multivariate Bayesian decoding**

326       The activation increases for older relative to younger adults raise the critical question  
327 of whether/how they contribute to sound localisation performance in older adults. Do these  
328 activations encode information about task-relevant variables such as stimulus location or  
329 audiovisual congruency, thereby enabling older adults to maintain auditory localisation  
330 accuracy? To address this question, we used model-based multivariate Bayesian decoding,  
331 which allows one to compare the ability of activation patterns in different brain regions to  
332 predict target variables. Specifically, we compared the predictive ability of three candidate  
333 ROIs: i. the regions activated jointly by older and younger adults [ $O \cap Y$ ], ii. the regions  
334 activated more by older than younger adults [ $O > Y$ ], and iii. the union of the two [ $O > Y \cup$   
335  $O \cap Y$ ]. We computed multivariate Bayesian decoding models separately for four target  
336 variables that relate to stimulus properties such as visual location, auditory location and  
337 spatial disparities ( $VisL \neq VisR$ ,  $AudL \neq AudR$ ,  $Incong5 \neq Cong5$ , and  $Incong15 \neq Cong15$ ).  
338 To match the number of features across ROIs we limited each model to the most significant  
339 1000 voxels in each ROI (see Materials and Methods for details). Summed over participants,  
340 log model evidence was greater for the [ $O > Y$ ] than for the [ $O \cap Y$ ] ROI for all target  
341 variables, suggesting that older participants show greater activations in regions that encode  
342 stimulus-relevant information in both age groups. Indeed, as shown in Fig 4, the age-related  
343 activation increases are found particularly in planum temporale and parietal cortices that have  
344 previously been shown to be critical for encoding spatial information about auditory and  
345 visual stimuli and their spatial congruency [10,40,41]. Moreover, the union model [ $O > Y \cup$   
346  $O \cap Y$ ] outperformed the more parsimonious models [ $O \cap Y$ ] and [ $O > Y$ ] for each of the target  
347 variables. Bayesian model selection indicated that the protected exceedance probability was  
348 above 0.81 for the union model across all target variables in both age groups (see Fig 6).  
349 These model comparison results collectively show that, in both age groups, the regions with

350 greater activations in older adults [ $O > Y$ ] encode significant information about task-relevant  
351 variables that is complementary to the information encoded in regions commonly activated  
352 by younger and older adults [ $O \cap Y$ ].

353         Next, we asked whether this increase in stimulus and task-relevant information for  
354 [ $O > Y$ ] regions is more prevalent or important in older adults, as they show more activations  
355 in these regions. To address this question, we assessed whether the union [ $O > Y \cup O \cap Y$ ]  
356 relative to the more parsimonious models [ $O \cap Y$ ] and [ $O > Y$ ] won more frequently in the  
357 older age group. Contrary to this conjecture, there were no significant age differences in the  
358 frequency with which the union model was the winning model for predicting any of the four  
359 target variables ( $\chi^2$  tests of association,  $p > .05$ ).

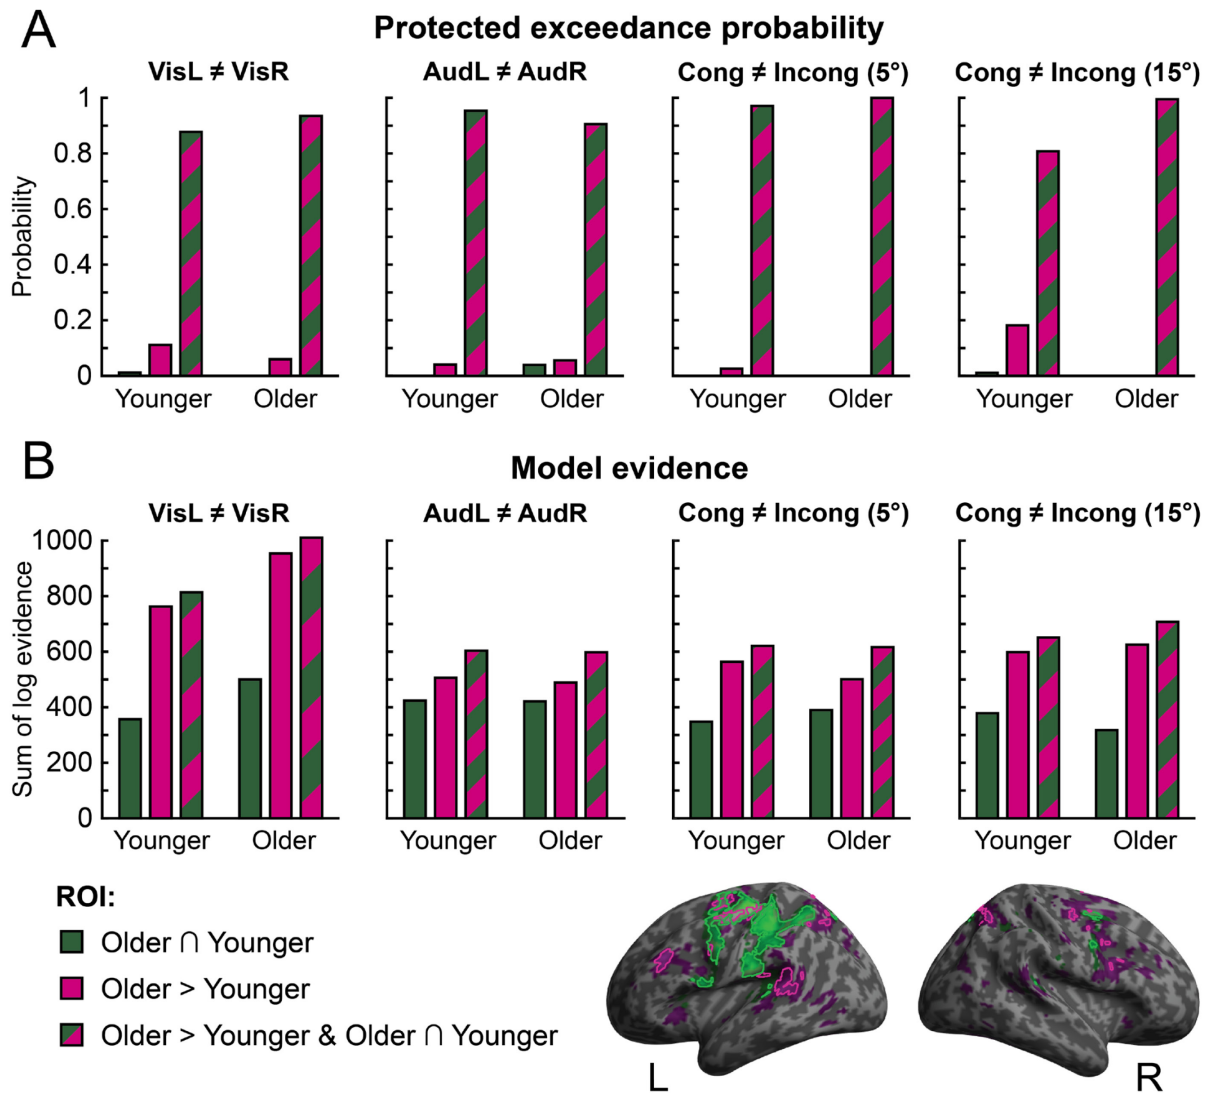

360

361 **Fig 6. Results of multivariate Bayesian decoding analysis (MVB).**

362 Comparison of three ROIs ( $[O \cap Y]$ ,  $[O > Y]$  or union of both:  $[O > Y \cup O \cap Y]$ ) in their ability

363 to predict stimulus related target variables: visual location, auditory location,

364 congruent/incongruent at  $5^\circ$  and congruent/incongruent at  $15^\circ$ . (A) Log model evidences,

365 summed over participants, are shown separately for each target variable and age group. (B)

366 Random-effects Bayesian model comparison across the three ROIs, separately for each target

367 variable and age group: protected exceedance probabilities for each ROI and target variable

368 are shown.

369 To further explore possible age differences, we investigated the relative contributions  
370 of the three ROIs to the encoding of task-relevant variables in older and younger participants  
371 by entering the difference in log model evidence for the union  $[O>Y \cup O \cap Y]$  ROI relative to  
372 the  $O \cap Y$  ROI for each older and younger participant into Mann-Whitney U tests, separately  
373 for each of the four target variables. None of these tests revealed any significant differences  
374 between age groups across the  $VisL \neq VisR$ ,  $AudL \neq AudR$ , and  $Incong5 \neq Cong5$  target  
375 variables,  $p > .05$ . Only for the  $Incong15 \neq Cong15$  target variable did we observe a small,  
376 non-significant trend for a greater “boost” in model evidence for the union  $[O>Y \cup O \cap Y]$   
377 ROI, relative to the  $O \cap Y$  ROI, for older adults compared to younger adults,  $U = 69.000$ ,  $p$   
378  $= .052$ , one tailed (Bonferroni corrected for the comparisons across the four target variables).

379 Taken together, these results suggest that task-relevant information is encoded in each  
380 of the ROIs and, in particular, in the ROIs that are more strongly activated by older adults  
381  $[O>Y]$ , suggesting that older adults boost activations in brain regions that are critical for task-  
382 performance and encoding stimulus-relevant information. Further, the information encoded in  
383 the conjunction  $[O \cap Y]$  and the ‘greater activation’  $[O>Y]$  ROIs were not redundant but at  
384 least partly complementary, so that the union ROI  $[O>Y \cup O \cap Y]$  outperformed both of those  
385 more parsimonious models. Crucially, however, this was true for both older and younger  
386 adults. Likewise, the additional information gained by adding the ‘greater activation’  $[O>Y]$   
387 ROI to the conjunction  $[O \cap Y]$  ROI was comparable in both age groups. These results  
388 suggest that older adults show increased activations in brain areas that are important for  
389 encoding stimulus- and task-relevant information to match the encoding capacities of their  
390 younger counterparts.

391

## Discussion

392

Healthy ageing leads to deficits in sensory processing and higher-order cognitive

393

mechanisms. Nevertheless, older adults have been shown to maintain the ability to

394

appropriately integrate and segregate audiovisual signals to aid stimulus localisation [32,42].

395

The present study investigated the neural mechanisms that support this maintenance of

396

performance.

397

Consistent with previous research [20,32,42,43], our behavioural results suggest that

398

older adults were largely able to maintain spatial localisation accuracy for unisensory

399

auditory and congruent audiovisual stimuli, but took substantially longer to respond than their

400

younger counterparts. For spatially incongruent audiovisual stimuli we observed small but

401

significant differences between the age groups. Specifically, at the larger (30°) spatial

402

disparity, older adults' sound localisation responses were more biased towards the location of

403

the spatially conflicting visual stimulus. These stronger audiovisual spatial biases were not

404

observed in previous behavioural research [32,42], and we suggest that they result from the

405

greater attentional resources that are needed to arbitrate between integration and segregation

406

of audiovisual signals in the noisy environment of the MRI scanner. Background noise

407

reduces a target sound's signal-to-noise ratio, increasing the attentional resources required to

408

identify and locate it, particularly in the presence of a highly salient and incongruent visual

409

distractor (as in our large audiovisual disparity condition). As argued in a recent review [31],

410

the greatest effects of ageing on multisensory integration are often found in situations of high

411

attentional demand featuring, for example, noise or distractor signals (see e.g. [44–46]).

412

Future behavioural research could further explore this hypothesis by assessing the effects of

413

ageing on spatial localisation in a ventriloquist task under various degrees of background

414

noise.

415           At the neural level, our multivariate analysis showed that audiovisual interactions  
416 increase progressively across the cortical hierarchy, as previously shown in human  
417 neuroimaging and neurophysiology studies [10,13,14,47–49]. Primary auditory cortices (A1)  
418 encoded primarily the location of the auditory component of the stimuli, and early visual  
419 cortices (V1 – V3) mainly that of the visual component, but small significant effects of  
420 sensory context and even audiovisual spatial congruency were observed even in these  
421 primary sensory areas. Again, these findings align nicely with a wealth of studies showing  
422 audiovisual interaction effects in primary sensory cortices [39,50–53]. Interestingly, a  
423 displaced visual stimulus biased the spatial encoding mainly at *small* spatial disparities in  
424 planum temporale, thereby mirroring the profile of crossmodal biases observed at the  
425 behavioural level. By contrast, a displaced auditory stimulus biased the spatial encoding  
426 mainly at *large* spatial disparities in visual cortices. The latter suggests that the crossmodal  
427 biases on spatial representations decoded from visual cortices arise mainly from top-down,  
428 possibly attentional, influences. At small spatial disparities the perceived location of the less  
429 spatially reliable sound is shifted towards the visual location, and thus does not affect spatial  
430 encoding in visual cortices. At large spatial disparities, audiovisual integration is attenuated  
431 or even abolished, so a spatially displaced sound may exert top-down attentional influences  
432 on the activation patterns in visual cortices.

433           Critically, however, none of these effects depended on age. Fig 3 shows that decoded  
434 stimulus locations were near identical in older and younger adults for unisensory auditory,  
435 congruent audiovisual, and incongruent audiovisual stimuli in all regions of interest. These  
436 results suggest that healthy ageing does not significantly alter how the brain integrates  
437 audiovisual inputs into spatial representations along the auditory or visual cortical pathways.

438           Despite these remarkably similar decoding profiles across the auditory and visual  
439 hierarchies between the two age groups, we observed significantly greater BOLD responses

440 across an extensive network of frontal, temporal, and parietal regions for older adults in the  
441 spatial localisation task. This is in line with previous work showing age-related increases in  
442 BOLD response, especially in frontal and parietal regions, in a wide variety of situations [54–  
443 57], including those that involve processing of complex multisensory stimuli [58]. In the  
444 present study, older adults showed greater activations in areas including superior temporal  
445 cortices (including plana temporalia), as well as inferior frontal sulci and intraparietal sulci.  
446 Some of these areas were adjacent to, or even partly overlapped with, those activated by both  
447 age groups (i.e. task-relevant activations above baseline were present in both groups, but  
448 were greater in older adults).

449         This dissociation between age-related increases in regional BOLD responses, and  
450 comparable decoding profiles along the audiovisual pathways, raises the question of what  
451 these activation increases contribute to task performance. What is their functional role? In  
452 this study we aimed to distinguish between two possible mechanisms. First, older adults may  
453 compensate for their noisier sensory inputs via top-down attentional mechanisms and longer  
454 accumulation of noisy evidence into a decision variable in higher order association areas such  
455 as frontoparietal cortices [59,60]. Indeed, recent computational modelling of audiovisual  
456 spatial localisation responses has suggested that older adults maintain spatial localisation  
457 accuracy by accumulating noisier sensory information for longer until a decision threshold is  
458 reached, and a response elicited [32]. Longer and more protracted evidence accumulation  
459 would be reflected in greater BOLD responses [38] for older than younger adults; yet, the  
460 regions with greater activations in older adults [O>Y] would contribute similarly to encoding  
461 relevant stimulus-relevant information (e.g. spatial location, congruency) across both age  
462 groups.

463         Second, older adults may recruit additional areas to compensate for processing and  
464 representational encoding deficits in other regions. This idea has previously been suggested



465 for a variety of scenarios in which older adults also showed increased activations [54,61,62]  
466 (though see also [56,63]). In this latter case, we would expect that the age-related activation  
467 increases encode information about task-relevant variables more strongly in older than in  
468 younger adults.

469 To adjudicate between these two potential neural mechanisms, we applied  
470 multivariate Bayesian analysis to compare the information about auditory location and  
471 audiovisual congruency that is encoded in areas with (1) joint activations in both age groups  
472 [ $O \cap Y$ ], (2) increased activations in older adults [ $O > Y$ ], and (3) the union of those two sets of  
473 regions [ $O > Y \cup O \cap Y$ ]. As expected, all three sets of regions encoded task-relevant  
474 information about sound location and audiovisual spatial disparity. Further, model  
475 comparison indicated that the ‘increased activations model’ outperformed the conjunction  
476 model. Yet, the union model still outperformed both more parsimonious models that included  
477 only one set of regions. Collectively, these results suggest that older adults enhance  
478 activations in brain areas that are critical for encoding stimulus-relevant information and that  
479 these regions provide stimulus-relevant information that is distinct (i.e. not redundant) from  
480 the information provided by the brain areas with joint activations. Crucially, this was true for  
481 both younger and older adults. Further, the boost in explanatory power when adding the  
482 [ $O > Y$ ] ROI was also comparable in older and younger adults. Collectively, these results  
483 support our first proposed mechanism: that older adults engage similar neural systems for  
484 audiovisual integration, but need to accumulate noisier sensory evidence for longer, and exert  
485 greater top-down attentional control to enable reliable neural encoding of stimulus-relevant  
486 information, thus maintaining spatial localisation accuracy. Put differently, because older  
487 adults accumulate noisy evidence for longer, we observe age-related activation increases in  
488 the frontoparietal system. Further, this longer evidence accumulation allows older adults to  
489 obtain spatial representations of comparable spatial precision as their younger counterparts,

490 which is reflected in the comparable spatial decoding accuracy at the neural level and spatial  
491 localisation accuracy at the behavioural level across age groups.

492           In conclusion, older adults have longer response times and greater frontoparietal  
493 activations than their younger counterparts. Yet, despite differences in BOLD-response  
494 magnitude, the spatial and stimulus-relevant information encoded in these regions is  
495 comparable across the two age groups. This dissociation—between comparable response  
496 accuracy and information encoded in brain activity patterns across the two age groups, but  
497 age-related increases in response times and regional activations—suggests that older  
498 participants accumulate noisier sensory evidence for longer, to maintain reliable neural  
499 encoding of stimulus-relevant information and thus preserve localisation accuracy.

500

## Materials and Methods

### 501 Participants

502 Twenty younger and twenty-nine older adults were initially recruited from participant  
503 databases for a behavioural screening session. Two older adults were excluded from the study  
504 due to the presence of MRI contraindications, three failed to score above 24 on the Montreal  
505 Cognitive Assessment [64], and one reported taking antidepressant medication. A further  
506 seven older, and three younger, adults were excluded for insufficient gaze fixation in the  
507 behavioural task (see below for details). One younger participant could not be contacted  
508 following the behavioural session. Therefore, 16 younger (mean age = 24.19,  $SD = 4.56$ , 10  
509 female) and 16 older (mean age = 70.75,  $SD = 4.71$ , 12 female) adults took part in all three  
510 experimental sessions. Those 32 included participants had normal or corrected-to-normal  
511 vision, reported no hearing impairment, and were able to distinguish left from right sounds  
512 with a just-noticeable difference (JND) of below 10°. The study was approved by the  
513 University of Birmingham Ethical Review Committee. All participants gave informed  
514 consent and were compensated for their time in cash or research credits.

### 515 Stimuli

516 Visual stimuli consisted of an 80ms flash of 20 white dots (diameter of 0.4° visual  
517 angle), whose locations were sampled from a bivariate Gaussian distribution with a standard  
518 deviation of 2.5° in horizontal and vertical directions, presented on a black background.

519 Auditory spatialised stimuli (80 ms duration) were created by convolving a burst of  
520 white noise (with 5 ms onset and offset ramps) with spatially specific head-related transfer  
521 functions (HRTFs) based on the KEMAR dummy head of the MIT Media Lab [65]. Sounds  
522 were generated independently for every trial and presented with a 5ms on/off ramp.

## 523 **Design and procedure (for main experiment inside the MRI** 524 **scanner)**

525 In a spatial ventriloquist paradigm, participants were presented with synchronous  
526 auditory and visual signals at the same or different locations. The auditory signal originated  
527 from one of four possible spatial locations ( $-15^\circ$ ,  $-5^\circ$ ,  $5^\circ$ , or  $15^\circ$  visual angle) along the  
528 azimuth. For any given auditory location, a synchronous visual signal was presented at the  
529 same spatial location (audiovisual congruent trial), at the symmetrically opposite location  
530 (audiovisual incongruent trial), or was absent (unisensory auditory trial). On each trial,  
531 observers reported the sound location as accurately as possible by pressing one of four  
532 spatially corresponding buttons with their right hand. Thus, our design conformed to a 4  
533 (auditory location:  $-15^\circ$ ,  $-5^\circ$ ,  $5^\circ$ , or  $15^\circ$  azimuth) x 3 (sensory context: unisensory auditory,  
534 audiovisual congruent, audiovisual incongruent) factorial design (see Fig 1B), though for  
535 behavioural statistical analyses on performance accuracy and response times we pooled over  
536 hemifields and rearranged the conditions into a 2 (eccentricity:  $\pm 5^\circ$  or  $\pm 15^\circ$ ) x 3 (sensory  
537 context: unisensory auditory, audiovisual congruent, audiovisual incongruent) factorial  
538 design (see below). Participants fixated a central cross (white;  $0.75^\circ$  diameter) throughout the  
539 experiment. Trials were presented with a stimulus onset asynchrony (SOA) of 2.3 s. To  
540 increase design efficiency, the activation trials were presented in a pseudorandomised fashion  
541 interleaved with 6.9 s fixation periods approximately every 20 trials. The experiment  
542 included 10 trials (per condition, per run) x 12 conditions x 11 five-minute runs (split over  
543 two separate days).

## 544 **Experimental setup**

545 Stimuli were presented using Version 3 of the Psychophysics Toolbox [66], running  
546 on MATLAB 2014b on an Apple MacBook. Auditory stimuli were presented at

547 approximately 75 dB SPL through Optime 1 electrodynamic headphones (MR Confon).  
548 Visual stimuli were back-projected by a JVC DLA-SX21E projector onto an acrylic screen,  
549 viewed via a mirror attached to the MRI head coil. The total viewing distance from eye to  
550 screen was 68cm. Participants responded using infrared response pads (Nata Technologies)  
551 held in the right hand.

## 552 **Behavioural testing session (outside the scanner)**

553 Participants took part in a total of three experimental sessions on three separate days  
554 (one behavioural, two MRI). In the first (behavioural) session they underwent training and  
555 screening.

556 First, in a left/right forced-choice spatial classification task, participants were  
557 presented on each trial with an auditory stimulus randomly at one of ten locations between -  
558 15° and 15° azimuth (-15°, -10°, -5°, -3°, -1°, 1°, 3°, 5°, 10°, 15°) and indicated via a two-  
559 choice button press whether they perceived the sound as coming from the left or right.

560 Second, they were trained to learn the mapping between the auditory locations (-15°, -  
561 5°, 5°, and 15°) and the four corresponding buttons used in the main ventriloquist paradigm.  
562 Via a four-choice key press, participants localised a sound that was presented randomly from  
563 one of the four locations on each trial. Feedback was provided after each response: correct  
564 responses were rewarded with a green square presented at the correct/responded location;  
565 incorrect responses resulted in a red square presented at the responded location, followed by a  
566 green square presented at the correct location. Participants completed up to five 20-trial  
567 blocks, stopping early if localisation accuracy (i.e. correct button responses) reached 90% in  
568 any block.

569 Third, participants completed two blocks of the spatial ventriloquist paradigm used  
570 during the two MRI scanning sessions. During these blocks, the scanner noise recorded from

571 an fMRI sequence was played over speakers at a level that approximately matched that  
572 experienced in the scanner (after adjustment for headphone attenuation). Analyses on data  
573 from this session are included in the Supporting Information.

574 Because many older adults find remaining still for extended periods of time  
575 challenging and painful, we were unable to perform reliable eye tracking during fMRI  
576 scanning due to the associated extra setup and calibration times. Therefore, to minimise the  
577 possibility of eye movement confounds in the fMRI data, we instead screened participants  
578 beforehand for their ability to maintain central fixation during the task. Throughout the two  
579 blocks of the ventriloquist paradigm, participants' eye movements were recorded via a Tobii  
580 EyeX eye tracker. A custom MATLAB script was used to remove blinks and identify  
581 saccades. For each participant, the peak location (i.e. furthest from fixation) of every  
582 recorded saccade was entered as the outcome variable in a linear regression analysis, with  
583 visual stimulus location as the predictor variable. Any participant for whom the stimulus  
584 location significantly predicted peak saccade location was not invited back for the MRI  
585 sessions. In this way, participants with stimulus-driven saccades were excluded from the  
586 study (seven older adults, three younger; see Participants subsection).

## 587 **Analysis of behavioural data**

### 588 **Auditory spatial classification task (outside the MRI scanner)**

589 For each observer, we computed the proportion of 'perceived right' for each of the ten  
590 locations. These ten data points can be predicted by the psychometric function  $\psi$ :

$$591 \quad \psi(x; \alpha, \beta, \gamma, \lambda) = \gamma + (1 - \gamma - \lambda)F(x; \alpha, \beta)$$

592 with

$$593 \quad F(x; \alpha, \beta) = \frac{\beta}{\sqrt{2\pi}} \int_{-\infty}^x \exp\left(-\frac{\beta^2(x - \alpha)^2}{2}\right)$$

594 Using a Nelder-Mead optimisation algorithm, as implemented in the Palamedes  
595 toolbox (Version 1.10.3) [67] for MATLAB, we fitted a four-parameter ( $\alpha$ ,  $\beta$ ,  $\lambda$ ,  $\gamma$ )  
596 cumulative Gaussian function to these data. The parameters of this function were the mean of  
597 the distribution  $\alpha$  (i.e. point of subjective equality, PSE), the slope parameter  $\beta$ , (i.e. the  
598 reciprocal of the participant's spatial uncertainty), and the lapse parameters  $\lambda$  and  $\gamma$  (i.e. the  
599 probability of incorrectly responding right when stimuli were perceived to be on the left, and  
600 vice versa). We calculated each participant's just-noticeable difference, a measure of spatial  
601 uncertainty, as the reciprocal of the fitted slope ( $JND = 1/\beta$ ).

602 The point of subjective equality (PSE) and the just noticeable difference (JND) for  
603 each subject were entered into separate independent-samples *t*-tests to compare older and  
604 younger adults. Note that a JND of less than 10° was specified as an inclusion criterion (all  
605 participants met this requirement). Results of equivalent Bayesian analyses are included in  
606 the Supporting Information.

### 607 **Spatial ventriloquist paradigm (inside and outside the MRI scanner)**

608 For each participant, we calculated the mean auditory localisation response for each  
609 combination of auditory and visual locations. To reduce the complexity of the analyses, we  
610 pooled over the two hemifields by multiplying the average localisation responses to stimuli  
611 where the sound was in the left hemifield with -1. Likewise, we pooled the response times  
612 over the two hemifields. Hence, instead of four auditory locations, we modelled eccentricity  
613 with two levels (large  $\pm 15^\circ$  versus small  $\pm 5^\circ$  visual angle). Subject-specific mean auditory  
614 localisation responses were entered into a 2 (eccentricity: small, large) x 3 (sensory context:  
615 unisensory auditory, audiovisual congruent, audiovisual incongruent) x 2 (group: younger,  
616 older) mixed ANOVA with the group factor as the only between-subjects factor. Please note  
617 that for audiovisual incongruent trials, small and large eccentricity directly maps onto small

618 and large audiovisual spatial disparity. A similar mixed ANOVA was conducted on  
619 participants' condition-specific median reaction times (again pooled over hemifields). Results  
620 of equivalent Bayesian analyses are included in the Supporting Information.

## 621 **MRI data acquisition**

622 A 3T Philips MRI scanner with 32-channel head coil was used to acquire both T1-  
623 weighted anatomical images (TR = 8.4 ms, TE = 3.8 ms, flip angle = 8°, FOV = 288 mm x  
624 232 mm, image matrix = 288 x 232, 175 sagittal slices acquired in ascending direction, voxel  
625 size = 1 x 1 x 1 mm) and T2\*-weighted axial echoplanar images with bold oxygenation level-  
626 dependent (BOLD) contrast (gradient echo, SENSE factor of 2, TR = 2800 ms, TE = 40 ms,  
627 flip angle = 90°, FOV = 192 mm x 192 mm, image matrix 76 x 76, 38 transversal slices  
628 acquired in ascending direction, voxel size = 2.5 x 2.5 x 2.5 mm with a 0.5 mm interslice  
629 gap).

630 Each participant took part in two one-hour scanning sessions, performed on separate  
631 days. In total (pooled over the two days), eleven task runs of 115 volumes each were acquired  
632 (i.e. 1265 scanning volumes in total). Each scanning session also involved a further 115-  
633 volume resting-state run, during which participants were instructed to fixate a central cross.  
634 Four additional volumes were discarded from each scanning run prior to the analysis to allow  
635 for T<sub>1</sub> equilibration effects.

## 636 **fMRI data analysis**

637 Our fMRI analysis assessed the commonalities and differences in audiovisual spatial  
638 processing and integration between younger and older adults by combining three  
639 complementary methodological approaches. First, we used multivariate pattern decoding with  
640 support vector regression to characterise how auditory and visual information are combined



641 into spatial representations along the dorsal visual and auditory processing hierarchies in  
642 younger and older participants. Second, we used conventional mass-univariate analyses to  
643 investigate how congruent and incongruent audiovisual stimulation influences univariate  
644 BOLD responses across the entire brain. Third, we used multivariate Bayesian decoding  
645 (MVB) to assess how the neural systems that show greater activations for older adults, as  
646 well as those that were activated in both groups, encode information about the spatial location  
647 or congruency of audiovisual stimuli.

### 648 **Preprocessing and within-subject (first-level) general linear models**

649 MRI data were analysed in SPM12 [68]. Each participant's functional scans were  
650 realigned/unwarped to correct for movement, slice-time corrected, and coregistered to the  
651 anatomical scan. For multivariate pattern decoding (i.e. support vector regression and  
652 multivariate Bayesian decoding), these native-space data were spatially smoothed with a  
653 Gaussian kernel of 3mm FWHM. For mass-univariate analyses and multivariate Bayesian  
654 decoding, the slice-time-corrected and realigned images were normalised into Montreal  
655 Neurological Institute (MNI) space using parameters from segmentation of the T1 structural  
656 image [69], resampled to a spatial resolution of  $2 \times 2 \times 2 \text{ mm}^3$  and spatially smoothed with a  
657 Gaussian kernel of 8 mm full-width at half-maximum.

658 The following processing steps were conducted separately on both native-space and  
659 MNI-transformed data. Each voxel's time series was high-pass filtered to 1/128Hz. The fMRI  
660 experiment was modelled in an event-related fashion with regressors entered into the design  
661 matrix after convolving each event-related unit impulse (coding the stimulus onset) with a  
662 canonical hemodynamic response function and its first temporal derivative. In addition to  
663 modelling the 12 conditions in our 4 (auditory location:  $-15^\circ$ ,  $-5^\circ$ ,  $5^\circ$ , or  $15^\circ$  visual angle)  $\times$  3  
664 (sensory context: unisensory auditory, audiovisual congruent, audiovisual incongruent)

665 within-subject factorial design, the model included the realignment parameters as nuisance  
666 covariates to account for residual motion artifacts. For the mass-univariate analysis and the  
667 multivariate Bayesian decoding analysis, the design matrix also modelled the button response  
668 choices as a single regressor to account for motor responses. To enable more reliable  
669 estimates of the activation patterns, we did not account for observers' response choices in the  
670 support vector regression analysis that is reported in this manuscript (sound locations and  
671 observers' sound localisation responses were highly correlated). However, a control analysis  
672 confirmed that the fMRI decoded spatial locations did not differ across age groups when  
673 observers' spatially specific responses were also modelled.

#### 674 **Correcting BOLD response for age-related changes in vascular reactivity**

675 To account for age-related changes in vascular reactivity, we corrected the BOLD-  
676 response amplitude (i.e. parameter estimates pertaining to the canonical hemodynamic  
677 response function) in each voxel in the MNI-normalised data based on the resting state  
678 fluctuation amplitude (RSFA or scan-to-scan signal variability)[70,71]. Resting-state data  
679 were preprocessed exactly as the task (i.e. spatial ventriloquist) data (i.e. realigned/unwarped,  
680 slice-time corrected, coregistered to the anatomical image, normalised to MNI space,  
681 resampled, and spatially smoothed with a Gaussian kernel of 8 mm FWHM). We applied  
682 additional steps to minimise the effect of motion, and other nuisance variables, on the signal.  
683 First, we applied wavelet despiking [72] and linear and quadratic detrending. The BOLD  
684 response over scans was then residualised with respect to the following regressors: white  
685 matter signal (the mean across all voxels containing white matter, according to SPM's  
686 automated segmentation algorithm, was taken for each volume, and the time-varying signal  
687 included as a regressor); cerebrospinal fluid signal (using the same procedure as with white  
688 matter); and movement parameters (and their first derivatives). The signal was then

689 bandpass-filtered at 0.01-0.08Hz to maximise the contribution of physiological factors to the  
690 signal fluctuation. The standard deviation of the remaining variation across scans at each  
691 voxel was calculated to create the final RSFA map (separately for each scanning day). The  
692 parameter estimates in each voxel, condition and subject were standardised by dividing by the  
693 relevant RSFA value prior to further analysis.

## 694 **Decoding audiovisual spatial estimates using support vector regression**

695       Using multivariate pattern decoding with support vector regression (SVR), we  
696 investigated how younger and older adults combine auditory and visual signals into spatial  
697 representations along the auditory and visual processing hierarchies. The basic rationale of  
698 this analysis is as follows: We first train a model to learn the mapping from fMRI activation  
699 patterns in regions of interest to stimulus locations in the external world based solely on  
700 congruent audiovisual stimuli. We then use this learnt mapping to decode the spatial locations  
701 from activation patterns of the incongruent audiovisual signals. In putatively unisensory  
702 auditory regions, locations decoded from fMRI activation patterns for incongruent trials  
703 should therefore reflect only the sound location (irrespective of the visual location); in  
704 unisensory visual regions, decoded locations should reflect only the visual location; and in  
705 audiovisual integration regions, the decoded locations should be somewhere between the  
706 auditory and visual locations. Hence, the locations decoded from activation patterns for  
707 audiovisual incongruent stimuli provide insights into how regions combine spatial  
708 information from vision and audition.

709       For the multivariate decoding analysis, we extracted the parameter estimates of the  
710 canonical hemodynamic response function for each condition and run from voxels of the  
711 regions of interest (i.e. fMRI activation vectors; see definition of region of interest section  
712 below). The parameter estimates pertaining to the canonical hemodynamic response function

713 defined the magnitude of the BOLD response to the auditory and audiovisual stimuli in each  
714 voxel. Each fMRI activation vector for the 12 conditions in our 4 (auditory location) x 3  
715 (sensory context) factorial design was based on 10 trials within a particular run. Activation  
716 vectors were normalised to between zero and one.

717 For each of the five regions of interest along the visual and auditory processing  
718 hierarchies we trained a SVR model (with default parameters  $C = 1$  and  $\gamma = 1/n$  features, as  
719 implemented in LIBSVM 3.17 [73], accessed via The Decoding Toolbox Version 3.96 [74])  
720 to learn the mapping from the fMRI activation vectors to the external spatial locations based  
721 on the audiovisual spatially *congruent* conditions from all but one of the 11 runs. This learnt  
722 mapping from activation patterns to external spatial locations was then used to decode the  
723 spatial location from the fMRI activation patterns of the unisensory auditory, audiovisual  
724 congruent, and audiovisual incongruent conditions of the remaining run. In a leave-one-run-  
725 out cross-validation scheme, the training-test procedure was repeated for all 11 runs. The  
726 decoded spatial estimates for each condition were then averaged across runs. As in the  
727 behavioural analysis, we pooled over hemifield by multiplying the decoded spatial estimates  
728 from trials that presented auditory stimuli in the left hemifield with -1. We entered these  
729 condition-specific decoded spatial estimates (pooled over hemifields) into a 2 (eccentricity:  
730 small [ $\pm 5^\circ$ ], large [ $\pm 15^\circ$ ] visual angle) x 3 (sensory context: unisensory auditory, audiovisual  
731 congruent, audiovisual incongruent) x 2 (age: younger, older participants) mixed ANOVA at  
732 the second (random effects) level separately for each region of interest. For analyses and  
733 plotting, incongruent conditions were labelled based on the location of the stimulus that  
734 corresponds with the ROI's dominant sensory modality: V1 - V3, IPS 0-2, and IPS3-4  
735 responses were labelled based on the location of the visual stimulus; PT and A1 were labelled  
736 based on the location of the auditory stimulus. Results of equivalent Bayesian analyses are  
737 included in the Supporting Information.

## 738 **Regions of interest for SVR analysis**

739 For the SVR analyses, all five regions of interest (ROI) were defined based on  
740 inverse-normalised group-level probabilistic maps along the auditory and visual processing  
741 streams, consistent with our previous research [5,10,13,14,51]. Left and right hemisphere  
742 maps were combined. Visual (V1 – V3) and intraparietal sulcus (IPS 0 – 2, IPS 3 – 4) ROIs  
743 were defined using retinotopic maximum probability maps [75]. Primary auditory cortex (A1)  
744 was defined based on cytoarchitectonic maximum probability maps [76]. The planum  
745 temporale (PT) was defined based on labels of the Destrieux atlas [77,78] , as implemented in  
746 Freesurfer 5.3.0 [79].

## 747 **Conventional second-level mass-univariate analysis**

748 Using conventional mass-univariate analysis, we next characterised activations for  
749 audiovisual stimuli relative to fixation, and audiovisual spatial incongruence, across the entire  
750 brain, and compared between older and younger participants. At the first level, condition-  
751 specific effects for each participant were estimated according to the general linear model (see  
752 earlier section) and passed to a second-level ANOVA as contrasts. Inferences were made at  
753 the second level to allow for random effects analysis and population-level inferences [80].

754 At the random effects (i.e. group) level we tested for:

- 755 1. Effects present in both age groups for all stimuli (unisensory auditory, audiovisual  
756 congruent, and audiovisual incongruent) relative to fixation:
  - 757 •  $(All_{Older} > Fixation_{Older}) \cap (All_{Younger} > Fixation_{Younger})$
- 758 2. Age group differences in the effects of all stimuli relative to fixation:
  - 759 •  $(All_{Older} > Fixation_{Older}) > (All_{Younger} > Fixation_{Younger})$
  - 760 •  $(All_{Younger} > Fixation_{Younger}) > (All_{Older} > Fixation_{Older})$
- 761 3. The effect of audiovisual spatial incongruence, averaged across age groups:

762                   • Incong > Cong

763           4. The interaction between audiovisual spatial incongruence and age group:

764                   • (Incong<sub>Older</sub> > Cong<sub>Older</sub>) > (Incong<sub>Younger</sub> > Cong<sub>Younger</sub>)

765                   • (Incong<sub>Younger</sub> > Cong<sub>Younger</sub>) > (Incong<sub>Older</sub> > Cong<sub>Older</sub>)

766                   Unless otherwise stated, activations are reported at  $p < .05$  at the voxel level, family-  
767 wise error (FWE) corrected for multiple comparisons across the entire brain.

## 768 **Multivariate Bayesian decoding**

769                   We assessed the extent to which activations identified by the mass-univariate analysis  
770 contributed to encoding of visual or auditory location, and their spatial relationship, in  
771 younger and older participants. Our key question was whether regions with greater  
772 activations for older than younger adults contribute more to encoding these task-relevant  
773 variables.

774                   To address this question, we used multivariate Bayesian Decoding (MVB), as  
775 implemented in SPM12 [34], which estimates the set of activation patterns that best predicts a  
776 particular target variable such as visual or auditory location using hierarchical parametric  
777 empirical Bayes. Critically, because each MVB model predicts a target variable (e.g. auditory  
778 location left vs. right) based on activation patterns, we can assess the relative contributions of  
779 different ROIs to encoding a particular target variable using Bayesian model comparison. In  
780 other words, we can use standard procedures of Bayesian model comparison to assess  
781 whether activation patterns in specific regions or sets of regions are better at encoding  
782 environmental properties. In particular, MVB allows us to ask whether areas with increased  
783 BOLD responses in older than younger adults make a critical contribution to information  
784 encoding (see below).

785           Because the decoding of a target variable based on a large number of voxel  
786    activations (relative to a small number of scans) is an ill-posed problem, MVB imposes priors  
787    on the pattern weights at the second level of the hierarchical model. The model also includes  
788    an overall sparsity (hyper) prior accommodating the assumption that only a few patterns  
789    make a large contribution to predicting the target variable. The pattern weights (i.e. the  
790    unknown parameters defining the mapping between activation pattern and target variable) are  
791    assigned to nested sets, in which each pattern within a subset has equal variance. A greedy  
792    search algorithm iteratively optimises this nested partitioning of pattern weights to maximise  
793    the free energy as an approximation to the log model evidence. MVB estimation furnishes the  
794    log evidence for a particular model that embodies a hypothesis about the relationship between  
795    patterns of voxel activation and a target variable [34,81]. The model evidence can then be  
796    used to compare different models using Bayesian model selection (BMS) at the group (i.e.  
797    random effects) level [82].

798           Specifically, we used MVB to compare representations of stimulus properties  
799    between three functionally defined ROIs:

- 800           1. Activations that are common to younger and older participants (referred to in  
801           the following as  $O \cap Y$ ), as specified by the conjunction (using the conjunction  
802           null [35,36]):  $(All_{Older} > Fixation_{Older}) \cap (All_{Younger} > Fixation_{Younger})$ .
- 803           2. Activations that were enhanced for older relative to younger participants  
804           (referred to as  $[O > Y]$ ), as specified by:  $(All_{Older} > Fixation_{Older}) > (All_{Younger} >$   
805            $Fixation_{Younger})$ .
- 806           3. The union  $[O > Y \cup O \cap Y]$  of each of the above two ROIs.

807           These regions of interest were defined based on the respective inverse normalised  
808    statistical comparisons at the random effects group level, using a leave-one-participant-out

809 scheme. They were constrained to include only the 1000 voxels with the greatest  $t$  value for  
810 the respective comparisons; the union ROI [ $O > Y \cup O \cap Y$ ] was created by randomly sampling  
811 500 voxels from each of the two component ROIs.

812 For each ROI we fitted four independent MVB models, predicting different target  
813 variables:

- 814 1. Visual location ( $\text{VisL} \neq \text{VisR}$ )
- 815 2. Auditory location ( $\text{AudL} \neq \text{AudR}$ )
- 816 3. Incongruency with 5° eccentricity ( $\text{Incong5} \neq \text{Cong5}$ )
- 817 4. Incongruency with 15° eccentricity ( $\text{Incong15} \neq \text{Cong15}$ )

818 Both predictor and target variables were residualised with respect to effects of no  
819 interest (i.e. all GLM covariates other than those involved in the target contrast).

820 The MVB analysis thus included the following steps:

821 First, we assessed whether information is encoded in a more sparse or distributed  
822 fashion in each region by comparing models in which patterns are individual voxels (i.e.  
823 ‘sparse’) versus clusters (i.e. smooth spatial prior). In our data the sparse model (in which the  
824 weights of individual voxels are optimised) outperformed the smooth model across all  
825 analyses (paired-sample  $t$ -tests of log model evidences,  $p < .001$ ), so we will focus  
826 selectively on the results from this model class.

827 We also ensured that the target variables could be decoded reliably from each ROI by  
828 comparing the evidence for each ‘model of interest’ with the evidence of models in which the  
829 design matrix had been randomly phase shuffled (i.e. stimulus onset times uniformly shifted  
830 by a random amount; this was repeated 20 times, and the mean of the log model evidence was  
831 taken; see e.g. [56] for a similar approach). Using  $t$  tests, we compared the difference in real  
832 versus shuffled model evidences and confirmed that the real models performed significantly



833 better for all ROIs and target variables ( $p < .05$ , one tailed) except  $\text{Incong15} \neq \text{Cong15}$  in the  
834  $\text{O} \cap \text{Y}$  ROI,  $t(31) = 1.24$ ,  $p = .113$ .

835 Next, and more importantly, we assessed which of the three candidate ROIs (i.e. 1.  
836  $[\text{O} \cap \text{Y}]$ , the conjunction of activations in older and younger; 2.  $[\text{O} > \text{Y}]$ , activation increases in  
837 older relative to younger adults; or 3.  $[\text{O} > \text{Y} \cup \text{O} \cap \text{Y}]$ , the union of ROIs 1 and 2) is the best  
838 model or predictor for each of the target variables, separately for the older and younger  
839 groups, by performing Bayesian model selection at the random effects (group) level, as  
840 implemented in SPM12 [82]. We report log model evidence values, as well as the protected  
841 exceedance probability that a given model is better than any of the other candidate models  
842 beyond chance [83]. If the regions with greater activations in older (relative to younger)  
843 adults make critical contributions to encoding the task-relevant target variable, we would  
844 expect the model evidence for the union  $[\text{O} > \text{Y} \cup \text{O} \cap \text{Y}]$  to exceed that of the conjunction  
845 model  $[\text{O} \cap \text{Y}]$ . Further, we formally assessed whether the frequency with which each ROI  
846 model “won” differed between age groups using a  $\chi^2$  test of association (one test per target  
847 variable). We report  $p$  values after Bonferroni correction for multiple (i.e. four target  
848 variables) comparisons.

849 Finally, we investigated whether the set of regions with greater activations for older  
850 participants (i.e.  $[\text{O} > \text{Y}]$  ROI) contributes more to the encoding of the critical target variables  
851 in older adults by comparing the difference in log model evidence for the union  $[\text{O} > \text{Y} \cup$   
852  $\text{O} \cap \text{Y}]$  ROI relative to the joint  $[\text{O} \cap \text{Y}]$  ROI between older and younger adults in a non-  
853 parametric Mann-Whitney U tests separately for each of the four target variables ( $\text{VisL} \neq$   
854  $\text{VisR}$ ,  $\text{AudL} \neq \text{AudR}$ ,  $\text{Incong5} \neq \text{Cong5}$ , and  $\text{Incong15} \neq \text{Cong15}$ ). We report  $p$  values after  
855 Bonferroni correction for multiple (i.e. four target variables) comparisons. Full output from  
856 these and the above-mentioned  $\chi^2$  tests, as well as Bayesian equivalents, are available in the  
857 Supporting Information.

858

## Acknowledgements

859

The authors wish to thank Susan Francis and Stephen Mayhew for helpful discussions

860

and support during the design of this research.

861  
862  
863  
864  
865  
866  
867  
868  
869  
870  
871  
872  
873  
874  
875  
876  
877  
878  
879  
880  
881  
882  
883  
884  
885

## References

1. Alais D, Burr D. The Ventriloquist Effect Results from Near-Optimal Bimodal Integration. *Curr Biol*. 2004;14: 257–262. doi:10.1016/j.cub.2004.01.029
2. Ernst MO, Banks MS. Humans integrate visual and haptic information in a statistically optimal fashion. *Nature*. 2002;415: 429–433. doi:10.1038/415429a
3. Fetsch CR, Pouget A, DeAngelis GC, Angelaki DE. Neural correlates of reliability-based cue weighting during multisensory integration. *Nat Neurosci*. 2012;15: 146–154. doi:10.1038/nn.2983
4. Helbig HB, Ernst MO, Ricciardi E, Pietrini P, Thielscher A, Mayer KM, et al. The neural mechanisms of reliability weighted integration of shape information from vision and touch. *NeuroImage*. 2012;60: 1063–1072. doi:10.1016/j.neuroimage.2011.09.072
5. Rohe T, Noppeney U. Reliability-Weighted Integration of Audiovisual Signals Can Be Modulated by Top-down Control. *eNeuro*. 2018; ENEURO.0315-17.2018. doi:10.1523/ENEURO.0315-17.2018
6. Battaglia PW, Jacobs RA, Aslin RN. Bayesian integration of visual and auditory signals for spatial localization. *J Opt Soc Am A*. 2003;20: 1391. doi:10.1364/JOSAA.20.001391
7. Meijer D, Veselić S, Calafiore C, Noppeney U. Integration of audiovisual spatial signals is not consistent with maximum likelihood estimation. *Cortex*. 2019;119: 74–88. doi:10.1016/j.cortex.2019.03.026
8. Beierholm U, Shams L, Ma WJ, Koerding K. Comparing Bayesian models for multisensory cue combination without mandatory integration. *Advances in neural information processing systems*. 2007. pp. 81–88. Available: [http://machinelearning.wustl.edu/mlpapers/paper\\_files/NIPS2007\\_368.pdf](http://machinelearning.wustl.edu/mlpapers/paper_files/NIPS2007_368.pdf)

- 886 9. Rohe T, Noppeney U. Sensory reliability shapes perceptual inference via two  
887 mechanisms. *J Vis.* 2015;15: 22.
- 888 10. Rohe T, Noppeney U. Cortical Hierarchies Perform Bayesian Causal Inference in  
889 Multisensory Perception. Kayser C, editor. *PLOS Biol.* 2015;13: e1002073.  
890 doi:10.1371/journal.pbio.1002073
- 891 11. Shams L, Beierholm UR. Causal inference in perception. *Trends Cogn Sci.* 2010;14:  
892 425–432. doi:10.1016/j.tics.2010.07.001
- 893 12. Wozny DR, Beierholm UR, Shams L. Probability Matching as a Computational  
894 Strategy Used in Perception. Maloney LT, editor. *PLoS Comput Biol.* 2010;6:  
895 e1000871. doi:10.1371/journal.pcbi.1000871
- 896 13. Rohe T, Noppeney U. Distinct Computational Principles Govern Multisensory  
897 Integration in Primary Sensory and Association Cortices. *Curr Biol.* 2016;26: 509–  
898 514. doi:10.1016/j.cub.2015.12.056
- 899 14. Ferrari A, Noppeney U. Attention controls multisensory perception via two distinct  
900 mechanisms at different levels of the cortical hierarchy. *PLOS Biol.* 2021;19:  
901 e3001465. doi:10.1371/journal.pbio.3001465
- 902 15. Odegaard B, Wozny DR, Shams L. The effects of selective and divided attention on  
903 sensory precision and integration. *Neurosci Lett.* 2016;614: 24–28.  
904 doi:10.1016/j.neulet.2015.12.039
- 905 16. Talsma D, Senkowski D, Soto-Faraco S, Woldorff MG. The multifaceted interplay  
906 between attention and multisensory integration. *Trends Cogn Sci.* 2010;14: 400–410.  
907 doi:10.1016/j.tics.2010.06.008
- 908 17. Vercillo T, Gori M. Attention to sound improves auditory reliability in audio-tactile  
909 spatial optimal integration. *Front Integr Neurosci.* 2015;9.  
910 doi:10.3389/fnint.2015.00034

- 911 18. Zuanazzi A, Noppeney U. Additive and interactive effects of spatial attention and  
912 expectation on perceptual decisions. *Sci Rep.* 2018;8: 6732. doi:10.1038/s41598-018-  
913 24703-6
- 914 19. Zuanazzi A, Noppeney U. Distinct Neural Mechanisms of Spatial Attention and  
915 Expectation Guide Perceptual Inference in a Multisensory World. *J Neurosci.*  
916 2019;39: 2301–2312. doi:10.1523/JNEUROSCI.2873-18.2019
- 917 20. Dobreva MS, O’Neill WE, Paige GD. Influence of aging on human sound  
918 localization. *J Neurophysiol.* 2011;105: 2471–2486. doi:10.1152/jn.00951.2010
- 919 21. Li KZH, Lindenberger U. Relations between aging sensory/sensorimotor and  
920 cognitive functions. *Neurosci Biobehav Rev.* 2002;26: 777–783. doi:10.1016/S0149-  
921 7634(02)00073-8
- 922 22. Salthouse TA, Hancock HE, Meinz EJ, Hambrick DZ. Interrelations of Age, Visual  
923 Acuity, and Cognitive Functioning. *J Gerontol B Psychol Sci Soc Sci.* 1996;51B:  
924 P317-330. doi:10.1093/geronb/51B.6.P317
- 925 23. Salthouse TA. Aging and measures of processing speed. *Biol Psychol.* 2000;54: 35–  
926 54. doi:10.1016/S0301-0511(00)00052-1
- 927 24. Bugg JM, DeLosh EL, Davalos DB, Davis HP. Age Differences in Stroop  
928 Interference: Contributions of General Slowing and Task-Specific Deficits. *Aging*  
929 *Neuropsychol Cogn.* 2007;14: 155–167. doi:10.1080/138255891007065
- 930 25. Tsvetanov KA, Mevorach C, Allen H, Humphreys GW. Age-related differences in  
931 selection by visual saliency. *Atten Percept Psychophys.* 2013;75: 1382–1394.  
932 doi:10.3758/s13414-013-0499-9
- 933 26. DeLoss DJ, Pierce RS, Andersen GJ. Multisensory Integration, Aging, and the Sound-  
934 Induced Flash Illusion. *Psychol Aging.* 2013;28: 802–812. doi:10.1037/a0033289

- 935 27. McGovern DP, Roudaia E, Stapleton J, McGinnity TM, Newell FN. The sound-  
936 induced flash illusion reveals dissociable age-related effects in multisensory  
937 integration. *Front Aging Neurosci.* 2014;6. doi:10.3389/fnagi.2014.00250
- 938 28. Sekiyama K, Soshi T, Sakamoto S. Enhanced audiovisual integration with aging in  
939 speech perception: a heightened McGurk effect in older adults. *Front Psychol.* 2014;5.  
940 doi:10.3389/fpsyg.2014.00323
- 941 29. Setti A, Burke KE, Kenny RA, Newell FN. Is inefficient multisensory processing  
942 associated with falls in older people? *Exp Brain Res.* 2011;209: 375–384.  
943 doi:10.1007/s00221-011-2560-z
- 944 30. Setti A, Burke KE, Kenny R, Newell FN. Susceptibility to a multisensory speech  
945 illusion in older persons is driven by perceptual processes. *Front Psychol.* 2013;4.  
946 doi:10.3389/fpsyg.2013.00575
- 947 31. Jones SA, Noppeney U. Ageing and multisensory integration: A review of the  
948 evidence, and a computational perspective. *Cortex.* 2021;138: 1–23.  
949 doi:10.1016/j.cortex.2021.02.001
- 950 32. Jones SA, Beierholm U, Meijer D, Noppeney U. Older adults sacrifice response speed  
951 to preserve multisensory integration performance. *Neurobiol Aging.* 2019;84: 148–  
952 157. doi:10.1016/j.neurobiolaging.2019.08.017
- 953 33. Park H, Nannt J, Kayser C. Sensory- and memory-related drivers for altered  
954 ventriloquism effects and aftereffects in older adults. *Cortex.* 2021;135: 298–310.  
955 doi:10.1016/j.cortex.2020.12.001
- 956 34. Friston K, Chu C, Mourão-Miranda J, Hulme O, Rees G, Penny W, et al. Bayesian  
957 decoding of brain images. *NeuroImage.* 2008;39: 181–205.  
958 doi:10.1016/j.neuroimage.2007.08.013

- 959 35. Nichols T, Brett M, Andersson J, Wager T, Poline J-B. Valid conjunction inference  
960 with the minimum statistic. *NeuroImage*. 2005;25: 653–660.  
961 doi:10.1016/j.neuroimage.2004.12.005
- 962 36. Friston KJ, Penny WD, Glaser DE. Conjunction revisited. *NeuroImage*. 2005;25:  
963 661–667. doi:10.1016/j.neuroimage.2005.01.013
- 964 37. Gau R, Noppeney U. How prior expectations shape multisensory perception.  
965 *NeuroImage*. 2016;124, Part A: 876–886. doi:10.1016/j.neuroimage.2015.09.045
- 966 38. Noppeney U, Ostwald D, Werner S. Perceptual Decisions Formed by Accumulation of  
967 Audiovisual Evidence in Prefrontal Cortex. *J Neurosci*. 2010;30: 7434–7446.  
968 doi:10.1523/JNEUROSCI.0455-10.2010
- 969 39. Werner S, Noppeney U. Distinct Functional Contributions of Primary Sensory and  
970 Association Areas to Audiovisual Integration in Object Categorization. *J Neurosci*.  
971 2010;30: 2662–2675. doi:10.1523/JNEUROSCI.5091-09.2010
- 972 40. Aller M, Mihalik A, Noppeney U. Audiovisual adaptation is expressed in spatial and  
973 decisional codes. *Nat Commun*. 2022;13: 3924. doi:10.1038/s41467-022-31549-0
- 974 41. Mihalik A, Noppeney U. Causal Inference in Audiovisual Perception. *J Neurosci*.  
975 2020;40: 6600–6612. doi:10.1523/JNEUROSCI.0051-20.2020
- 976 42. Park H, Nannt J, Kayser C. Diversification of perceptual mechanisms underlying  
977 preserved multisensory behavior in healthy aging. *Neuroscience*; 2020 Feb.  
978 doi:10.1101/2020.02.12.945949
- 979 43. Dobрева MS, O’Neill WE, Paige GD. Influence of age, spatial memory, and ocular  
980 fixation on localization of auditory, visual, and bimodal targets by human subjects.  
981 *Exp Brain Res*. 2012;223: 441–455. doi:10.1007/s00221-012-3270-x

- 982 44. Barrett MM, Newell FN. Task-Specific, Age Related Effects in the Cross-Modal  
983 Identification and Localisation of Objects. *Multisensory Res.* 2015;28: 111–151.  
984 doi:10.1163/22134808-00002479
- 985 45. Furman JM, Müller MLTM, Redfern MS, Jennings JR. Visual–vestibular stimulation  
986 interferes with information processing in young and older humans. *Exp Brain Res.*  
987 2003;152: 383–392. doi:10.1007/s00221-003-1560-z
- 988 46. Mevorach C, Spaniol MM, Soden M, Galea JM. Age-dependent distractor suppression  
989 across the vision and motor domain. *J Vis.* 2016;16: 27. doi:10.1167/16.11.27
- 990 47. Cao Y, Summerfield C, Park H, Giordano BL, Kayser C. Causal Inference in the  
991 Multisensory Brain. *Neuron.* 2019;102: 1076-1087.e8.  
992 doi:10.1016/j.neuron.2019.03.043
- 993 48. Dahl CD, Logothetis NK, Kayser C. Spatial organization of multisensory responses in  
994 temporal association cortex. *J Neurosci Off J Soc Neurosci.* 2009;29: 11924–11932.  
995 doi:10.1523/JNEUROSCI.3437-09.2009
- 996 49. Rohe T, Ehrlis A-C, Noppeney U. The neural dynamics of hierarchical Bayesian causal  
997 inference in multisensory perception. *Nat Commun.* 2019;10: 1907.  
998 doi:10.1038/s41467-019-09664-2
- 999 50. Besle J, Fischer C, Bidet-Caulet A, Lecaigard F, Bertrand O, Giard M-H. Visual  
1000 Activation and Audiovisual Interactions in the Auditory Cortex during Speech  
1001 Perception: Intracranial Recordings in Humans. *J Neurosci.* 2008;28: 14301–14310.  
1002 doi:10.1523/JNEUROSCI.2875-08.2008
- 1003 51. Gau R, Bazin P-L, Trampel R, Turner R, Noppeney U. Resolving multisensory and  
1004 attentional influences across cortical depth in sensory cortices. *eLife.* 2020;9: e46856.  
1005 doi:10.7554/eLife.46856



- 1006 52. Iurilli G, Ghezzi D, Olcese U, Lassi G, Nazzaro C, Tonini R, et al. Sound-driven  
1007 synaptic inhibition in primary visual cortex. *Neuron*. 2012;73: 814–828.  
1008 doi:10.1016/j.neuron.2011.12.026
- 1009 53. Martuzzi R, Murray MM, Michel CM, Thiran J-P, Maeder PP, Clarke S, et al.  
1010 Multisensory Interactions within Human Primary Cortices Revealed by BOLD  
1011 Dynamics. *Cereb Cortex*. 2007;17: 1672–1679. doi:10.1093/cercor/bhl077
- 1012 54. Davis SW, Dennis NA, Daselaar SM, Fleck MS, Cabeza R. Que PASA? The  
1013 posterior-anterior shift in aging. *Cereb Cortex N Y N 1991*. 2008;18: 1201–1209.  
1014 doi:10.1093/cercor/bhm155
- 1015 55. Jimura K, Braver TS. Age-Related Shifts in Brain Activity Dynamics during Task  
1016 Switching. *Cereb Cortex*. 2010;20: 1420–1431. doi:10.1093/cercor/bhp206
- 1017 56. Morcom AM, Henson RNA. Increased Prefrontal Activity with Aging Reflects  
1018 Nonspecific Neural Responses Rather than Compensation. *J Neurosci*. 2018;38:  
1019 7303–7313. doi:10.1523/JNEUROSCI.1701-17.2018
- 1020 57. Velanova K, Lustig C, Jacoby LL, Buckner RL. Evidence for Frontally Mediated  
1021 Controlled Processing Differences in Older Adults. *Cereb Cortex*. 2007;17: 1033–  
1022 1046. doi:10.1093/cercor/bhl013
- 1023 58. Townsend J, Adamo M, Haist F. Changing channels: An fMRI study of aging and  
1024 cross-modal attention shifts. *NeuroImage*. 2006;31: 1682–1692.  
1025 doi:10.1016/j.neuroimage.2006.01.045
- 1026 59. Kiani R, Hanks TD, Shadlen MN. Bounded Integration in Parietal Cortex Underlies  
1027 Decisions Even When Viewing Duration Is Dictated by the Environment. *J Neurosci*.  
1028 2008;28: 3017–3029. doi:10.1523/JNEUROSCI.4761-07.2008
- 1029 60. Kim J-N, Shadlen MN. Neural correlates of a decision in the dorsolateral prefrontal  
1030 cortex of the macaque. *Nat Neurosci*. 1999;2: 176–185. doi:10.1038/5739

- 1031 61. Grady C. The cognitive neuroscience of ageing. *Nat Rev Neurosci*. 2012;13: 491.  
1032 doi:10.1038/nrn3256
- 1033 62. Reuter-Lorenz PA, Cappell KA. Neurocognitive Aging and the Compensation  
1034 Hypothesis. *Curr Dir Psychol Sci*. 2008;17: 177–182. doi:10.1111/j.1467-  
1035 8721.2008.00570.x
- 1036 63. Morcom AM, Johnson W. Neural Reorganization and Compensation in Aging. *J Cogn  
1037 Neurosci*. 2015;27: 1275–1285. doi:10.1162/jocn\_a\_00783
- 1038 64. Nasreddine ZS, Phillips NA, Bédirian V, Charbonneau S, Whitehead V, Collin I, et al.  
1039 The Montreal Cognitive Assessment, MoCA: a brief screening tool for mild cognitive  
1040 impairment. *J Am Geriatr Soc*. 2005;53: 695–699. doi:10.1111/j.1532-  
1041 5415.2005.53221.x
- 1042 65. Gardner B, Martin K. HRTF Measurements of a KEMAR Dummy Head Microphone.  
1043 1994. Report No.: 280.
- 1044 66. Kleiner M, Brainard D, Pelli D. What’s new in Psychtoolbox-3? 30th European  
1045 Conference on Visual Perception. 2007.
- 1046 67. Prins N, Kingdom FAA. Applying the Model-Comparison Approach to Test Specific  
1047 Research Hypotheses in Psychophysical Research Using the Palamedes Toolbox.  
1048 *Front Psychol*. 2018;9. doi:10.3389/fpsyg.2018.01250
- 1049 68. Friston KJ, Holmes AP, Worsley KJ, Poline J-P, Frith CD, Frackowiak RSJ. Statistical  
1050 parametric maps in functional imaging: A general linear approach. *Hum Brain Mapp*.  
1051 1994;2: 189–210. doi:10.1002/hbm.460020402
- 1052 69. Ashburner J, Friston KJ. Unified segmentation. *NeuroImage*. 2005;26: 839–851.  
1053 doi:10.1016/j.neuroimage.2005.02.018

- 1054 70. Kannurpatti SS, Biswal BB. Detection and scaling of task-induced fMRI-BOLD  
1055 response using resting state fluctuations. *NeuroImage*. 2008;40: 1567–1574.  
1056 doi:10.1016/j.neuroimage.2007.09.040
- 1057 71. Tsvetanov KA, Henson RNA, Tyler LK, Davis SW, Shafto MA, Taylor JR, et al. The  
1058 effect of ageing on fMRI: Correction for the confounding effects of vascular reactivity  
1059 evaluated by joint fMRI and MEG in 335 adults. *Hum Brain Mapp*. 2015;36: 2248–  
1060 2269. doi:10.1002/hbm.22768
- 1061 72. Patel AX, Kundu P, Rubinov M, Jones PS, Vértes PE, Ersche KD, et al. A wavelet  
1062 method for modeling and despiking motion artifacts from resting-state fMRI time  
1063 series. *NeuroImage*. 2014;95: 287–304. doi:10.1016/j.neuroimage.2014.03.012
- 1064 73. Chang C, Lin C. LIBSVM: a library for support vector machines. *ACM Transactions*  
1065 *on Intelligent Systems and Technology*. 2011. p. 27:1-27:27.
- 1066 74. Hebart MN, Gørgen K, Haynes J-D. The Decoding Toolbox (TDT): a versatile  
1067 software package for multivariate analyses of functional imaging data. *Front*  
1068 *Neuroinformatics*. 2015;8: 88. doi:10.3389/fninf.2014.00088
- 1069 75. Wang L, Mruczek REB, Arcaro MJ, Kastner S. Probabilistic Maps of Visual  
1070 Topography in Human Cortex. *Cereb Cortex*. 2015;25: 3911–3931.  
1071 doi:10.1093/cercor/bhu277
- 1072 76. Eickhoff SB, Stephan KE, Mohlberg H, Grefkes C, Fink GR, Amunts K, et al. A new  
1073 SPM toolbox for combining probabilistic cytoarchitectonic maps and functional  
1074 imaging data. *NeuroImage*. 2005;25: 1325–1335.  
1075 doi:10.1016/j.neuroimage.2004.12.034
- 1076 77. Dale AM, Fischl B, Sereno MI. Cortical Surface-Based Analysis: I. Segmentation and  
1077 Surface Reconstruction. *NeuroImage*. 1999;9: 179–194. doi:10.1006/nimg.1998.0395

- 1078 78. Destrieux C, Fischl B, Dale A, Halgren E. Automatic parcellation of human cortical  
1079 gyri and sulci using standard anatomical nomenclature. *NeuroImage*. 2010;53: 1–15.  
1080 doi:10.1016/j.neuroimage.2010.06.010
- 1081 79. Fischl B. FreeSurfer. *NeuroImage*. 2012;62: 774–781.  
1082 doi:10.1016/j.neuroimage.2012.01.021
- 1083 80. Friston KJ, Holmes AP, Price CJ, Büchel C, Worsley KJ. Multisubject fMRI studies  
1084 and conjunction analyses. *NeuroImage*. 1999;10: 385–396.  
1085 doi:10.1006/nimg.1999.0484
- 1086 81. Morcom AM, Friston KJ. Decoding episodic memory in ageing: A Bayesian analysis  
1087 of activity patterns predicting memory. *NeuroImage*. 2012;59: 1772–1782.  
1088 doi:10.1016/j.neuroimage.2011.08.071
- 1089 82. Stephan KE, Penny WD, Daunizeau J, Moran RJ, Friston KJ. Bayesian model  
1090 selection for group studies. *NeuroImage*. 2009;46: 1004–1017.  
1091 doi:10.1016/j.neuroimage.2009.03.025
- 1092 83. Rigoux L, Stephan KE, Friston KJ, Daunizeau J. Bayesian model selection for group  
1093 studies — Revisited. *NeuroImage*. 2014;84: 971–985.  
1094 doi:10.1016/j.neuroimage.2013.08.065
